# Supplementary material for: QSAR and Molecular Docking Studies of the Inhibitory Activity of Novel Heterocyclic GABA Analogues over GABA-AT
Source: PubMed Central journal article supplement (PMC6278377; doi:10.3390/molecules23112984), 2018-11-15
Supplement: molecules-23-02984-s001.pdf [file molecules-23-02984-s001.pdf]

## Supplementary Material

### QSAR and Molecular Docking Studies of the Inhibitory Activity of Novel Heterocyclic GABA Analogues over GABA-AT

Josué Rodríguez-Lozada<sup>1</sup>, Erika Tovar-Gudiño<sup>1</sup>, Juan Alberto Guevara-Salazar<sup>2</sup>, Rodrigo Said Razo-Hernández<sup>3</sup>, Ángel Santiago<sup>3</sup>, Nina Pastor<sup>3</sup>, Mario Fernández-Zertuche<sup>1\*</sup>

#### Table of Contents

|                                                                                                                                    |    |
|------------------------------------------------------------------------------------------------------------------------------------|----|
| NMR Data for analogues 7, 8 and 9                                                                                                  | 08 |
| Computational Details                                                                                                              | 24 |
| NMR Data for analogues 7, 8 and 9                                                                                                  |    |
| <b>Figure 1S.</b> <sup>1</sup> H NMR (200 MHz, CD <sub>3</sub> OD) of 4-(thiazolidin-3-yl)butanoic acid ( <b>7a</b> )              | 06 |
| <b>Figure 2S.</b> <sup>13</sup> C NMR (50 MHz, CD <sub>3</sub> OD) of 4-(thiazolidin-3-yl)butanoic acid ( <b>7a</b> )              | 06 |
| <b>Figure 3S.</b> <sup>1</sup> H NMR (400 MHz, CD <sub>3</sub> OD) of 4-(piperidin-1-yl)butanoic acid ( <b>7b</b> ).               | 07 |
| <b>Figure 4S.</b> <sup>13</sup> C NMR (400 MHz, CD <sub>3</sub> OD) of 4-(piperidin-1-yl)butanoic acid ( <b>7b</b> ).              | 07 |
| <b>Figure 5S.</b> <sup>1</sup> H NMR (400 MHz, D <sub>2</sub> O) of 4-(3-methylpiperidin-1-yl)butanoic acid ( <b>7c</b> )          | 07 |
| <b>Figure 6S.</b> <sup>13</sup> C NMR (100 MHz, D <sub>2</sub> O) of sodium 4-(3-methylpiperidin-1-yl)butanoic acid ( <b>7c</b> ). | 08 |
| <b>Figure 7S.</b> <sup>1</sup> H NMR (400 MHz, CD <sub>3</sub> OD) of 4-(4-methylpiperidin-1-yl)butanoic acid ( <b>7d</b> ).       | 08 |
| <b>Figure 8S.</b> <sup>13</sup> C NMR (100 MHz, CD <sub>3</sub> OD) of 4-(4-methylpiperidin-1-yl)butanoic acid ( <b>7d</b> ).      | 08 |
| <b>Figure 9S.</b> <sup>1</sup> H NMR (400 MHz, CD <sub>3</sub> OD) of 4-morpholinobutanoic acid ( <b>7e</b> ).                     | 09 |
| <b>Figure 10S.</b> <sup>13</sup> C NMR (100 MHz, CD <sub>3</sub> OD) of                                                            | 09 |

4-morpholinobutanoic acid (**7e**).

**Figure 11S.** <sup>1</sup>H NMR (400 MHz, CD<sub>3</sub>OD) of 4-thiomorpholinobutanoic acid (**7f**). 09

**Figure 12S.** <sup>13</sup>C NMR (100 MHz, CD<sub>3</sub>OD) of 4-thiomorpholinobutanoic acid (**7f**). 10

**Figure 13S.** <sup>1</sup>H NMR (400 MHz, CD<sub>3</sub>OD) of 5-methyl-3-(thiazolidin-3-ylmethyl)hexanoic acid (**8a**). 10

**Figure 14S.** <sup>13</sup>C NMR (100 MHz, CD<sub>3</sub>OD) of 5-methyl-3-(thiazolidin-3-ylmethyl)hexanoic acid (**8a**). 10

**Figure 15S.** 2D NMR (HETCOR 400 MHz, CD<sub>3</sub>OD) of 5-methyl-3-(thiazolidin-3-ylmethyl)hexanoic acid (**8a**). 11

**Figure 16S.** <sup>1</sup>H NMR (400 MHz, CD<sub>3</sub>OD) of 5-methyl-3-(piperidin-1-ylmethyl)hexanoic acid (**8b**). 11

**Figure 17S.** <sup>13</sup>C NMR (100 MHz, CD<sub>3</sub>OD) of 5-methyl-3-(piperidin-1-ylmethyl)hexanoic acid (**8b**). 12

**Figure 18S.** 2D NMR (HETCOR 400 MHz, CD<sub>3</sub>OD) of 5-methyl-3-(piperidina-1-ylmethyl) hexanoic acid (**8b**). 12

**Figure 19S.** <sup>1</sup>H NMR (400 MHz, CD<sub>3</sub>OD) of 5-methyl-3-((3-methylpiperidin-1-yl)methyl)hexanoic acid (**8c**). 13

**Figure 20S.** <sup>13</sup>C NMR (100 MHz, CD<sub>3</sub>OD) of 5-methyl-3-((3-methylpiperidin-1-yl)methyl)hexanoic acid (**8c**). 13

**Figure 21S.** 2D NMR (HETCOR 400 MHz, CD<sub>3</sub>OD) of 5-methyl-3-((3-methylpiperidin-1-yl)methyl)hexanoic acid (**8c**). 14

**Figure 22S.** <sup>1</sup>H NMR (400 MHz, CD<sub>3</sub>OD) of 5-methyl-3-((4-methylpiperidin-1-yl)methyl)hexanoic acid (**8d**). 14

**Figure 23S.** <sup>13</sup>C NMR (100 MHz, CD<sub>3</sub>OD) of 5-methyl-3-((4-methylpiperidin-1-yl)methyl)hexanoic acid (**8d**). 15

**Figure 24S.** 2D NMR (HETCOR 400 MHz, CD<sub>3</sub>OD) of 5-methyl-3-((4-methylpiperidin-1-yl)methyl)hexanoic acid (**8d**). 16

|                                                                                                                                                    |    |
|----------------------------------------------------------------------------------------------------------------------------------------------------|----|
| <b>Figure 25S.</b> <sup>1</sup> H NMR (400 MHz, CD <sub>3</sub> OD) of 5-methyl-3-(morpholinomethyl)hexanoic acid ( <b>8e</b> ).                   | 16 |
| <b>Figure 26S.</b> <sup>13</sup> C NMR (100 MHz, CD <sub>3</sub> OD) of 5-methyl-3-(morpholinomethyl)hexanoic acid ( <b>8e</b> ).                  | 17 |
| <b>Figure 27S.</b> <sup>1</sup> H NMR (400 MHz, CD <sub>3</sub> OD) of 5-methyl-3-(thiomorpholinomethyl)hexanoic acid ( <b>8e</b> ).               | 17 |
| <b>Figure 28S.</b> <sup>13</sup> C NMR (100 MHz, CD <sub>3</sub> OD) of 5-methyl-3-(thiomorpholinomethyl)hexanoic acid ( <b>8f</b> ).              | 18 |
| <b>Figure 29S.</b> <sup>1</sup> H NMR (400 MHz, CD <sub>3</sub> OD) of 3-(4-chlorophenyl)-4-(piperidin-1-yl)butanoic acid ( <b>9b</b> ).           | 18 |
| <b>Figure 30S.</b> <sup>13</sup> C NMR (100 MHz, CD <sub>3</sub> OD) of 3-(4-chlorophenyl)-4-(piperidin-1-yl)butanoic acid ( <b>9b</b> ).          | 18 |
| <b>Figure 31S.</b> <sup>1</sup> H NMR (400 MHz, CD <sub>3</sub> OD) of 3-(4-chlorophenyl)-4-(3-methylpiperidin-1-yl)butanoic acid ( <b>9c</b> ).   | 19 |
| <b>Figure 32S.</b> <sup>13</sup> C NMR (100 MHz, CD <sub>3</sub> OD) of 3-(4-chlorophenyl)-4-(3-methylpiperidin-1-yl)butanoic acid ( <b>9c</b> ).  | 19 |
| <b>Figure 33S.</b> <sup>1</sup> H NMR (400 MHz, CD <sub>3</sub> OD) of 3-(4-chlorophenyl)-4-(4-methylpiperidin-1-yl) butanoic acid ( <b>9d</b> ).  | 19 |
| <b>Figure 34S.</b> <sup>13</sup> C NMR (100 MHz, CD <sub>3</sub> OD) of 3-(4-chlorophenyl)-4-(4-methylpiperidin-1-yl) butanoic acid ( <b>9d</b> ). | 20 |
| <b>Figure 35S.</b> 2D NMR (HETCOR 400 MHz, CD <sub>3</sub> OD) of 3-(4-chlorophenyl)-4-(4-methylpiperidin-1-yl)butanoic acid ( <b>9d</b> ).        | 20 |
| <b>Figure 36S.</b> <sup>1</sup> H NMR (400 MHz, CD <sub>3</sub> OD) of 3-(4-chlorophenyl)-4-morpholinobutanoic acid ( <b>9e</b> ).                 | 21 |
| <b>Figure 37S.</b> <sup>13</sup> C NMR (100 MHz, CD <sub>3</sub> OD) of 3-(4-chlorophenyl)-4-morpholinobutanoic acid ( <b>9e</b> ).                | 21 |
| <b>Figure 38S.</b> <sup>1</sup> H NMR (400 MHz, CD <sub>3</sub> OD) of 3-(4-chlorophenyl)-4-thiomorpholinobutanoic acid ( <b>9f</b> ).             | 22 |
| <b>Figure 39S.</b> <sup>13</sup> C NMR (100 MHz, CD <sub>3</sub> OD) of 3-(4-chlorophenyl)-4-thiomorpholinobutanoic acid ( <b>9f</b> ).            | 22 |
| <b>Figure 40S.</b> 2D NMR (HETCOR 400 MHz, CD <sub>3</sub> OD) of 3-(4-chlorophenyl)-4-thiomorpholinobutanoic acid ( <b>9f</b> ).                  | 23 |

- Figure 41S.** Alignment of *pseudomonas fluorescens* (PF), human (HS), *E. coli* (EC) and wild boar (JB). Red and blue color letters corresponds to the residues of the chain A and chain B respectively, that interact with vigabatrin in the 1ohv crystal structure 24
- Figure 42S.** Validation of the molecular docking calculation for the pseudomonas model. Ligand in the PDB:ID 3r4t crystal structure was reproduced with a RMSD of 1.7 Å. Ligand experimental (opaque color) and calculated conformation (shiny color) are displayed as sticks representation respectively. Residues within 4.0 Å of both ligands are shown as thin sticks 25
- Figure 43S.** Validation of the molecular docking calculation for the human model. Ligand in the PDB:ID 1ohw crystal structure was reproduced with a RMSD of 1.3 Å. Ligand experimental (opaque color) and calculated conformation (shiny color) are displayed as sticks representation respectively. Residues within 4.0 Å of both ligands are shown as thin sticks. 25
- Figure 44S.** Validation of the molecular docking calculation for the human model. Ligand in the PDB:ID 1ohy crystal structure was reproduced with a RMSD of 1.8 Å. Ligand experimental (opaque color) and calculated conformation (shiny color) are displayed as sticks representation respectively. Residues within 4.0 Å of both ligands are shown as thin sticks. 26
- Figure 45S.** Optimized structures of all GABA analogues, VPNa and VGB. 27
- Figure 46S.** Interactions between GABA analogues 7 and *Pseudomonas fluorescens* GABA-AT. a) 7a, b) 7b, c) 7c, d) 7d, e) 7e and f) 7f. PLP prosthetic group is showed as Van der Waals spheres and each protein chain is colored in green and cyan. Residues at 4 Å of each analogue are indicated. Hydrogen bonds are shown as orange dashed lines. 30
- Figure 47S.** Interactions between GABA analogues 8 and *Pseudomonas fluorescens* GABA-AT. a) (S)-8a, b) (R)-8a, c) (S)-8b, d) (R)-8b, e) (S)-8c and f) (R)-8c, g) (S)-8d, h) (R)-8d, i) (S)-8e, j) (R)-8e, k) (S)-8f, l) (R)-8f. PLP prosthetic group is showed as Van der Waals spheres and each protein chain is colored in green and cyan. Residues at 4 Å of each analogue are indicated. Hydrogen bonds are shown as orange dashed lines. 31
- Figure 48S.** Interactions between GABA analogues 9 and *Pseudomonas fluorescens* GABA-AT. a) (S)-9c, b) (R)-9c, c) (S)-9d and d) (R)-9d, e) (S)-9e, f) (R)-9e, g) (S)-9f, h) (R)-9f. PLP prosthetic group is showed as Van der Waals spheres and each protein chain is colored in green and cyan. Residues at 4 Å of each analogue are indicated. Hydrogen bonds are shown as orange dashed lines. 33

**Table 1S.** Energy interactions values obtained from the docking calculations of all GABA derivatives and *pseudomonas* GABA-AT model. All the values are in kcal/mol. 34

**Figure 49S.** Interactions between GABA analogues 7 and *Human* GABA-AT. a) 7a, b) 7b, c) 7c, d) 7d, e) 7e and f) 7f. PLP prosthetic group is showed as Van der Waals spheres and each protein chain is colored in yellow and red. Residues at 4 Å of each analogue are indicated. Hydrogen bonds are shown as orange dashed lines. 35

**Figure 50S.** Interactions between GABA analogues 8 and *Human* GABA-AT. a) (S)-8a, b) (R)-8a, c) (S)-8b, d) (R)-8b, e) (S)-8c and f) (R)-8c, g) (S)-8d, h) (R)-8d, i) (S)-8e, j) (R)-8e, k) (S)-8f, l) (R)-8f. PLP prosthetic group is showed as Van der Waals spheres and each protein chain is colored in yellow and red. Residues at 4 Å of each analogue are indicated. Hydrogen bonds are shown as orange dashed lines. 37

**Figure 51S.** Interactions between GABA analogues 9 and *Human* GABA-AT. a) (S)-9b, b) (R)-9b, c) (S)-9c and d) (R)-9c, e) (S)-9d, f) (R)-9d, g) (S)-9e, h) (R)-9e, i) (S)-9f, j) (R)-9f. PLP prosthetic group is showed as Van der Waals spheres and each protein chain is colored in yellow and red. Residues at 4 Å of each analogue are indicated. Hydrogen bonds are shown as orange dashed lines. 39

**Figure 52S.** Backbone structural alignment of GABA-AT structures. a) GABA-AT human model in cyan color. 1ohv, 1ohw and 1ohy *Sus scrofa* crystal structures in red (RMSD=0.35), gray (RMSD=0.36) and orange (RMSD=0.40) color respectively. b) GABA-AT *Pseudomonas fluorescens* model in shiny red color, 1sf2 *E. coli* structure in shiny yellow color (RMSD= 0.52). Fe<sub>2</sub>S<sub>2</sub> (yellow/pink color) and PLP from human model in VDW representation. 40

**Table 2S.** Energy interactions values obtained from the docking calculations of all GABA derivatives and *human* GABA-AT model. All the values are in kcal/mol. 41

**Table 3S.** Values of the experimental ( $Y_{Exp}$ ), calculated ( $Y_{Cal}$ ) and predicted ( $Y_{Pred}$ ) percent of inhibition of the GABA derivatives. Compounds that were considered form the test validation are marked with a script symbol. 42

## NMR Spectra of compounds.

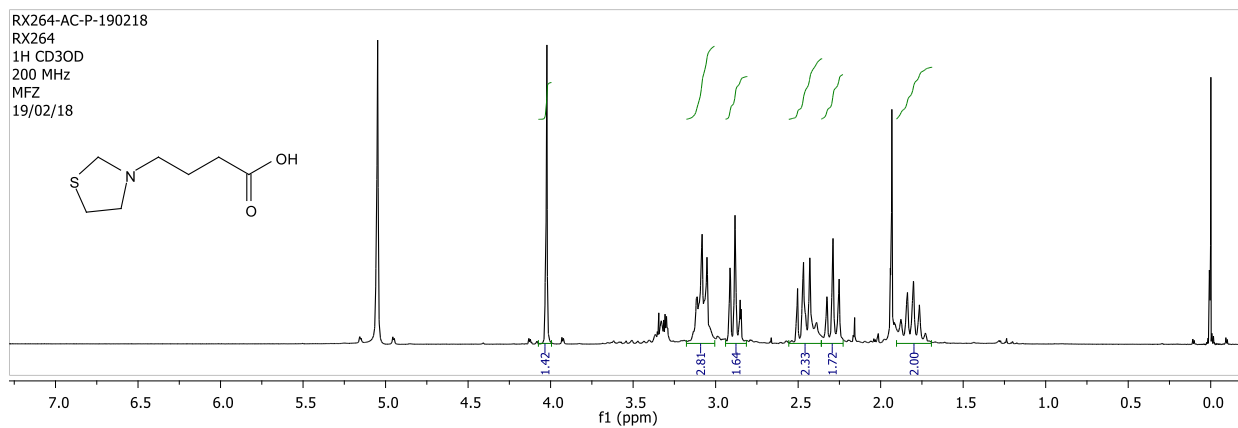

**Figure 1S.**  $^1\text{H}$  NMR (200 MHz,  $\text{CD}_3\text{OD}$ ) of 4-(thiazolidin-3-yl)butanoic acid (**7a**).

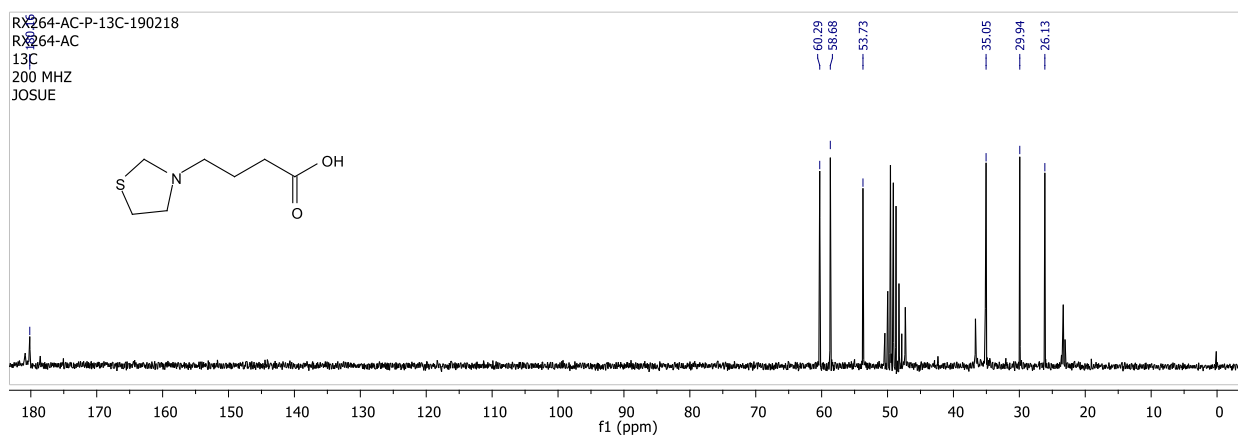

**Figure 2S.**  $^{13}\text{C}$  NMR (50 MHz,  $\text{CD}_3\text{OD}$ ) of 4-(thiazolidin-3-yl)butanoic acid (**7a**)

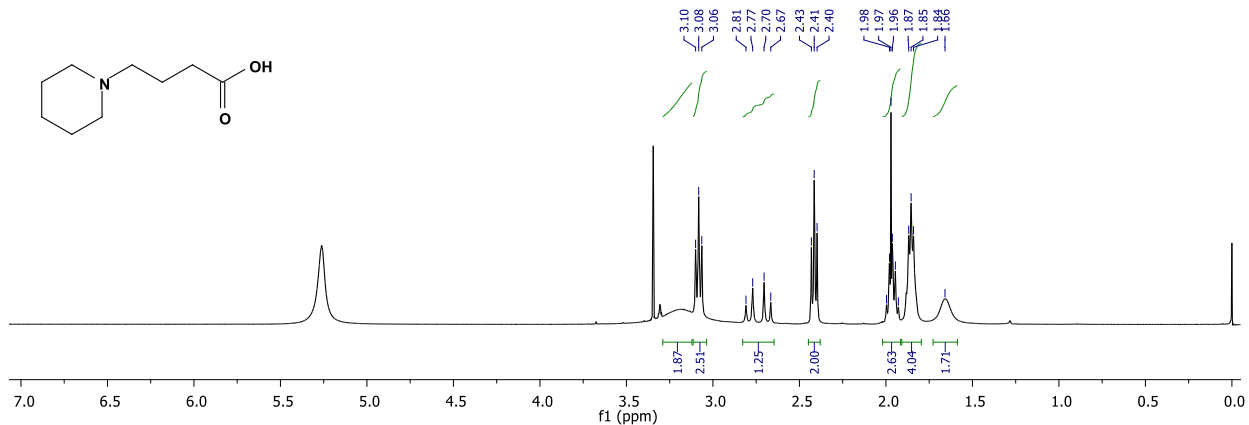

**Figure 3S.**  $^1\text{H}$  NMR (400 MHz,  $\text{CD}_3\text{OD}$ ) of 4-(piperidin-1-yl)butanoic acid (**7b**).

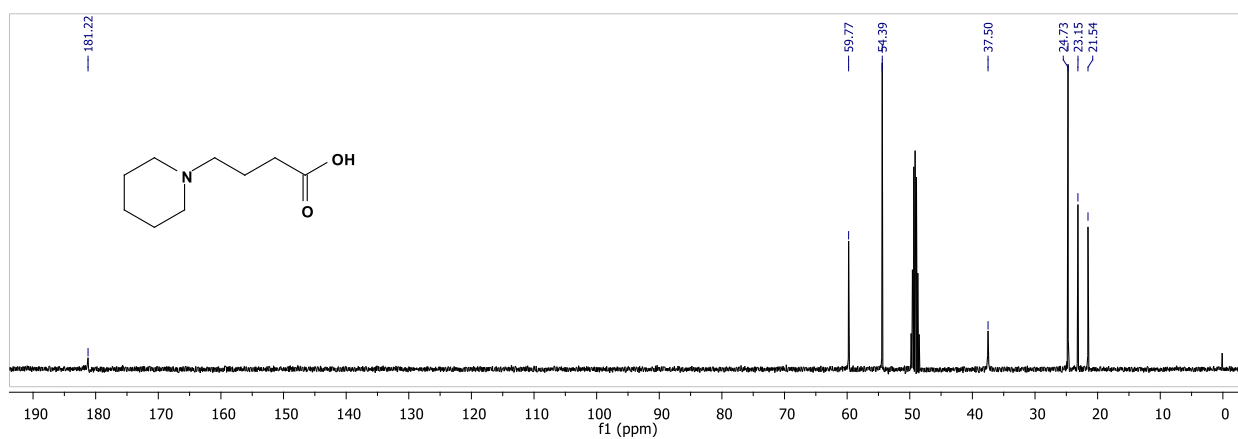

**Figure 4S.**  $^{13}\text{C}$  NMR (400 MHz,  $\text{CD}_3\text{OD}$ ) of 4-(piperidin-1-yl)butanoic acid (**7b**).

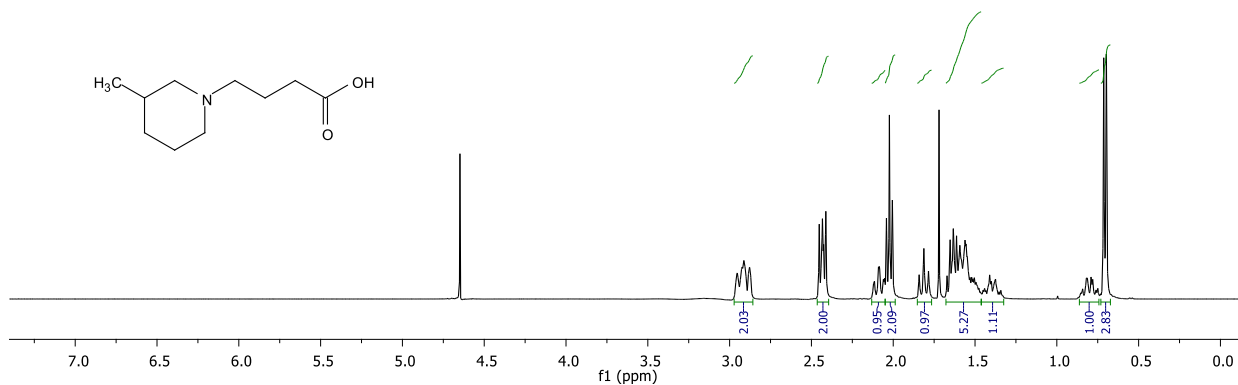

**Figure 5S.**  $^1\text{H}$  NMR (400 MHz,  $\text{D}_2\text{O}$ ) of 4-(3-methylpiperidin-1-yl)butanoic acid (**7c**).

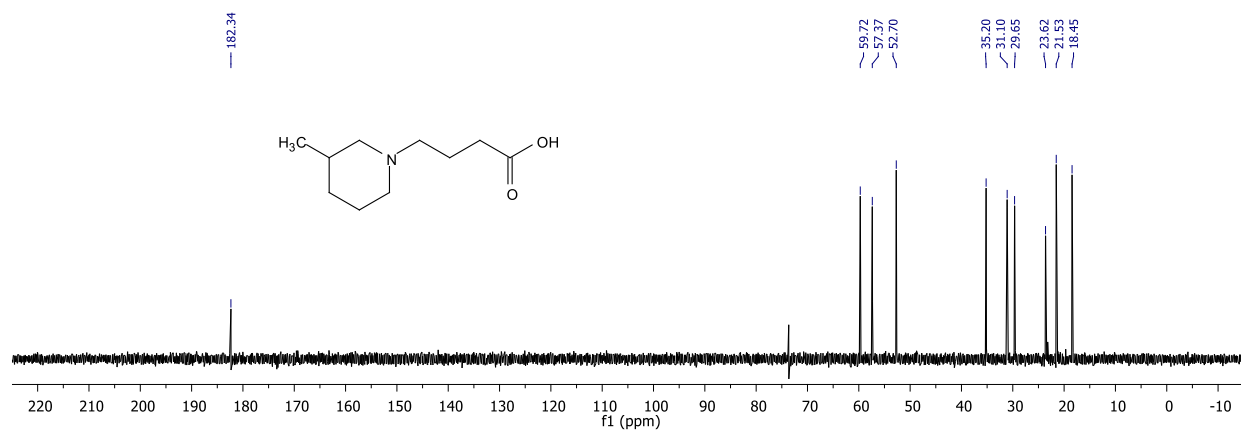

Figure 6S. <sup>13</sup>C NMR (100 MHz, D<sub>2</sub>O) of sodium 4-(3-methylpiperidin-1-yl)butanoic acid (7c).

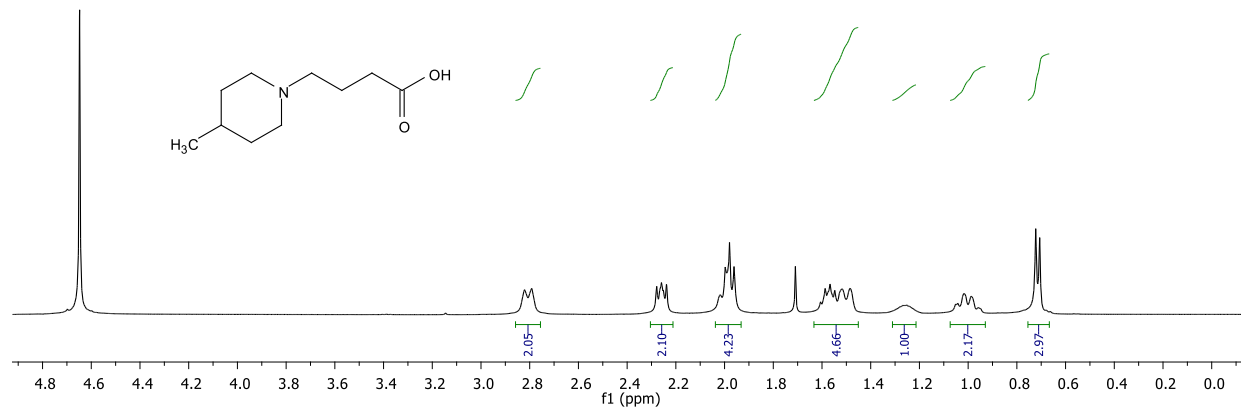

Figure 7S. <sup>1</sup>H NMR (400 MHz, CD<sub>3</sub>OD) of 4-(4-methylpiperidin-1-yl)butanoic acid (7d).

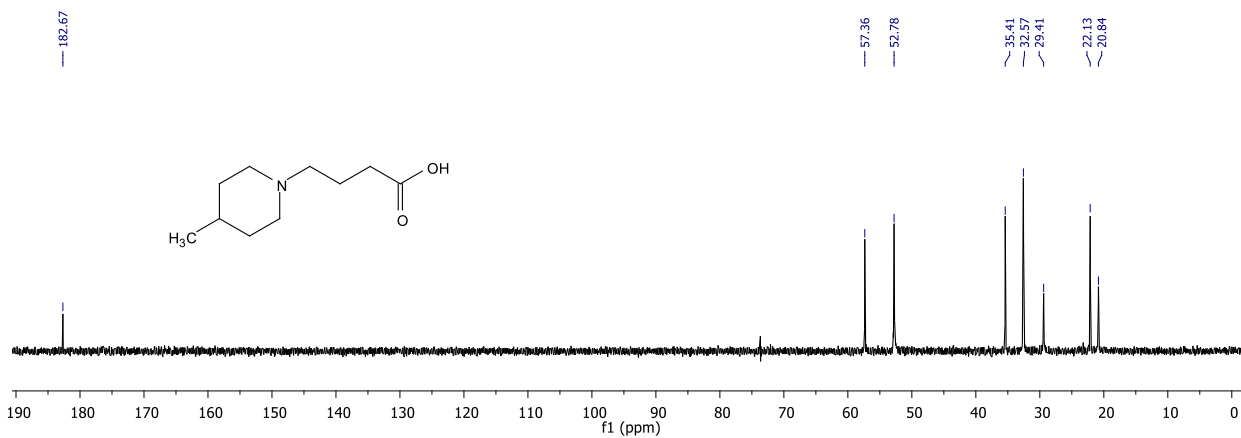

Figure 8S. <sup>13</sup>C NMR (100 MHz, CD<sub>3</sub>OD) of 4-(4-methylpiperidin-1-yl)butanoic acid (7d).



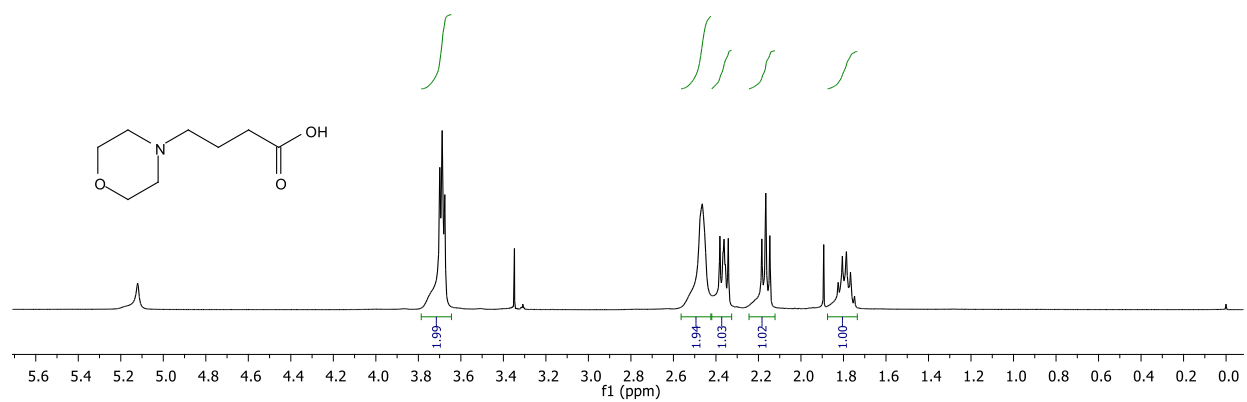

**Figure 9S.** <sup>1</sup>H NMR (400 MHz, CD<sub>3</sub>OD) of 4-morpholinobutanoic acid (7e).

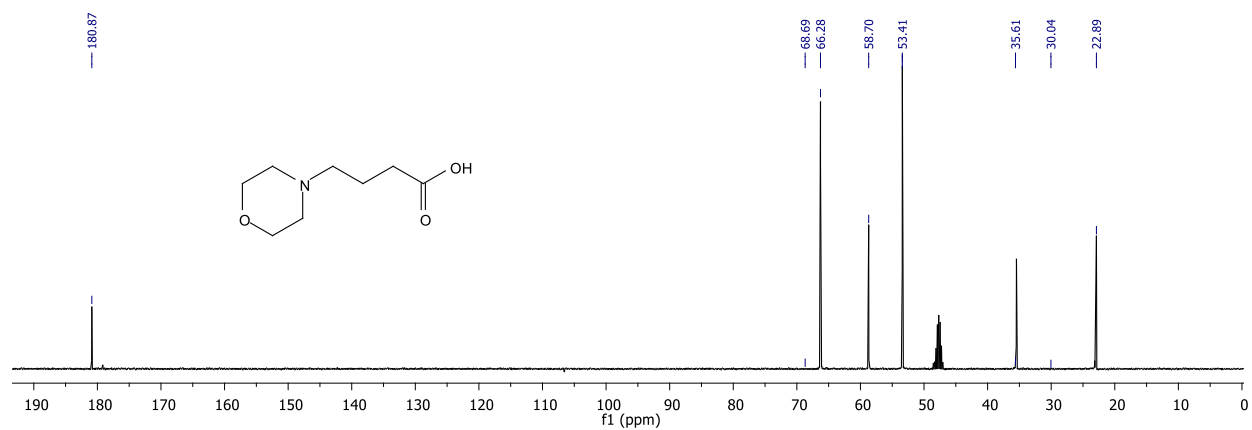

**Figure 10S.** <sup>13</sup>C NMR (100 MHz, CD<sub>3</sub>OD) of 4-morpholinobutanoic acid (7e).

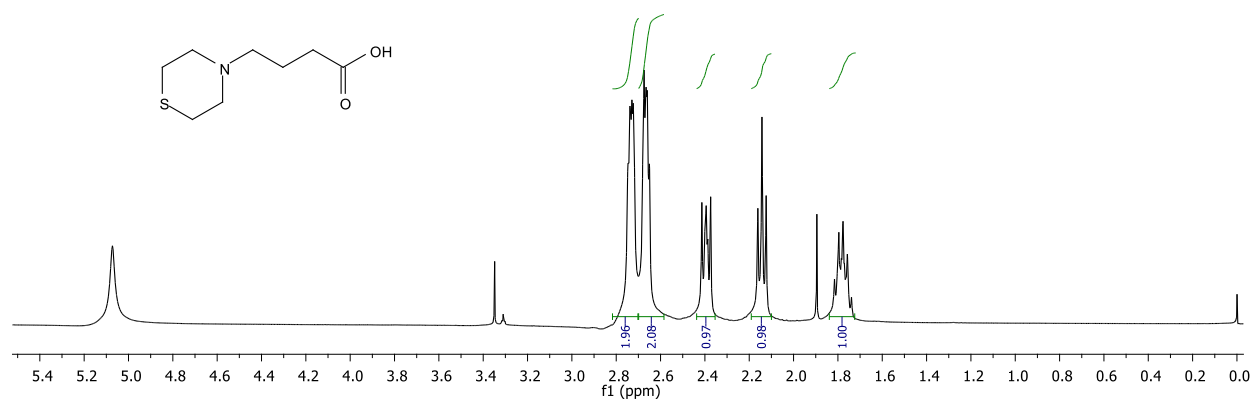

**Figure 11S.** <sup>1</sup>H NMR (400 MHz, CD<sub>3</sub>OD) of 4-thiomorpholinobutanoic acid (7f).

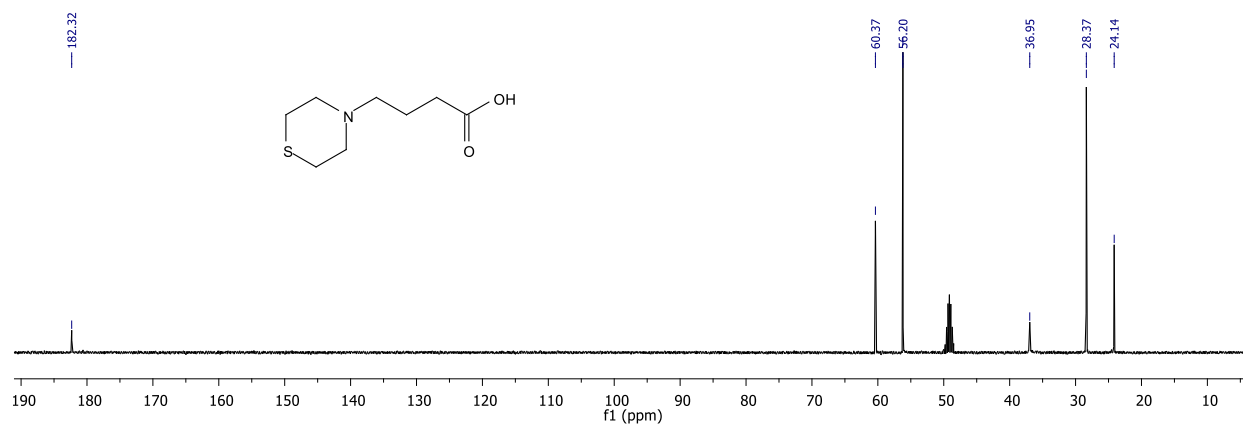

Figure 12S.  $^{13}\text{C}$  NMR (100 MHz,  $\text{CD}_3\text{OD}$ ) of 4-thiomorpholinobutanoic acid (7f).

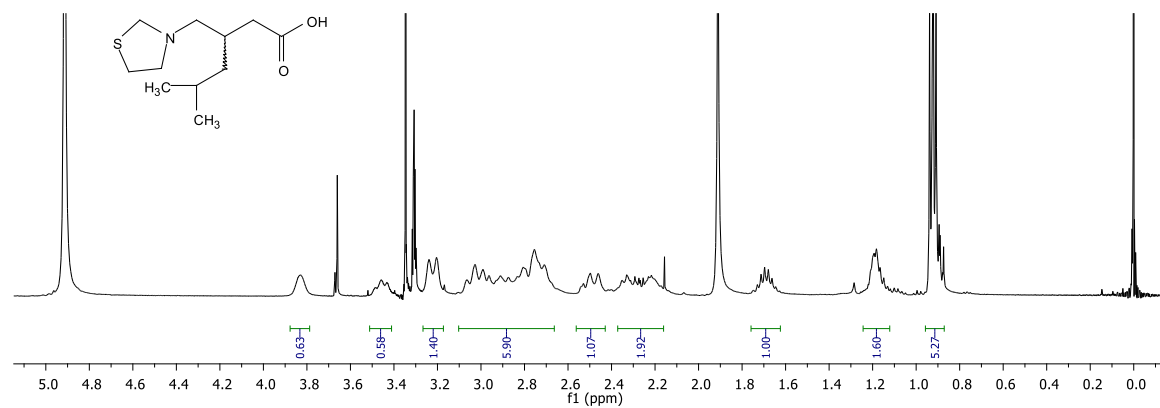

Figure 13S.  $^1\text{H}$  NMR (400 MHz,  $\text{CD}_3\text{OD}$ ) of 5-methyl-3-(thiazolidin-3-ylmethyl)hexanoic acid (8a).

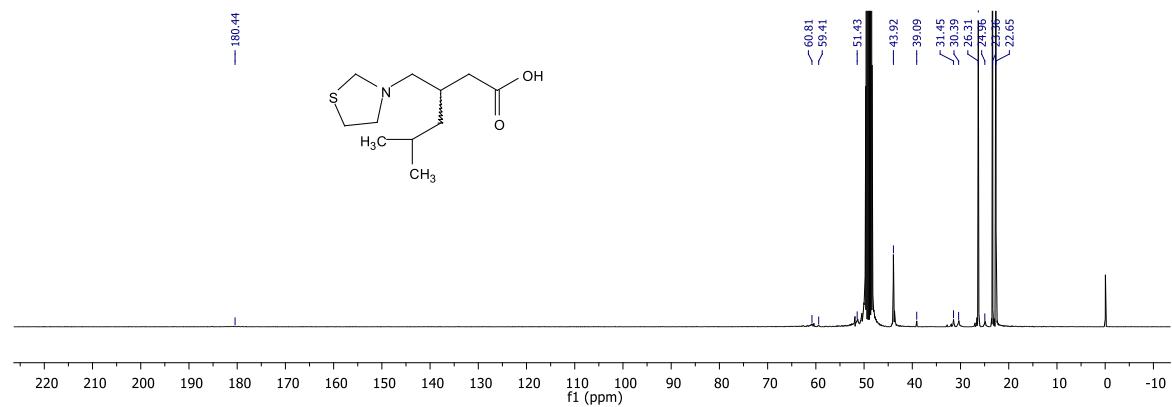

Figure 14S.  $^{13}\text{C}$  NMR (100 MHz,  $\text{CD}_3\text{OD}$ ) of 5-methyl-3-(thiazolidin-3-ylmethyl)hexanoic acid (8a).

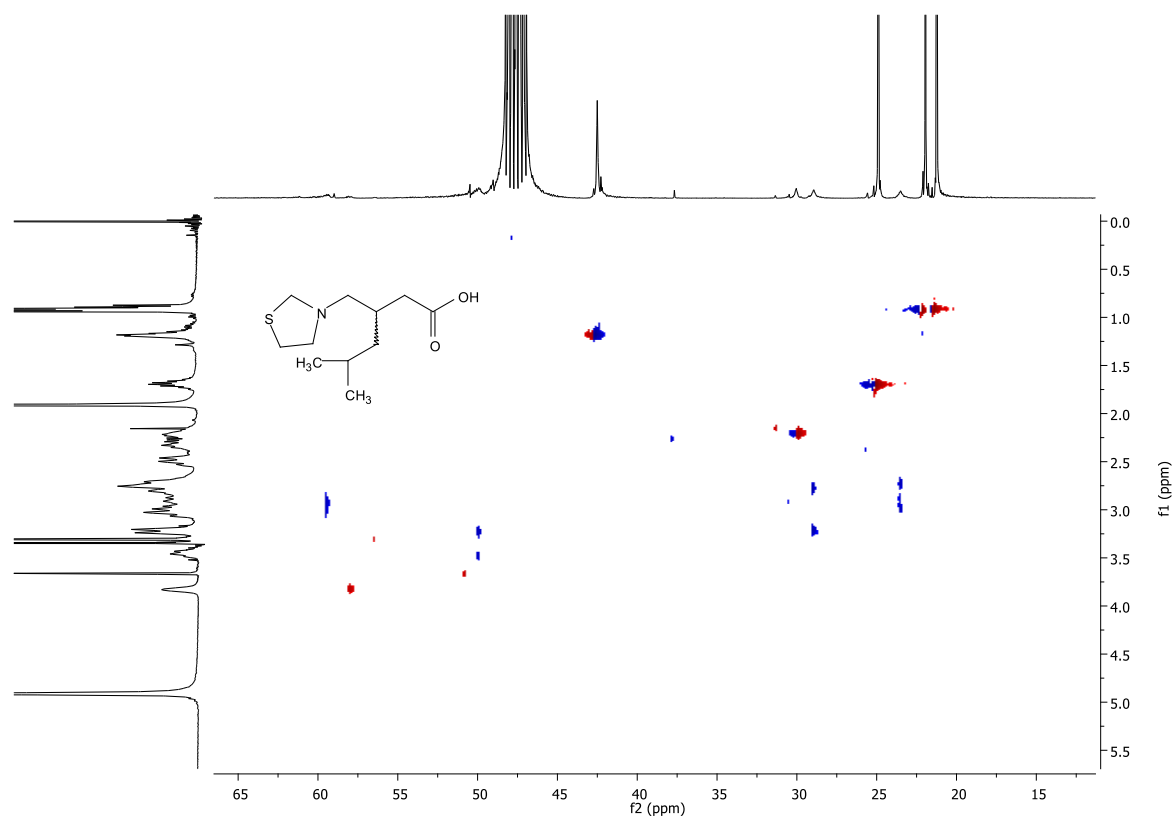

**Figure 15S.** 2D NMR (HETCOR 400 MHz, CD<sub>3</sub>OD) of 5-methyl-3-(thiazolidin-3-ylmethyl)hexanoic acid (**8a**).

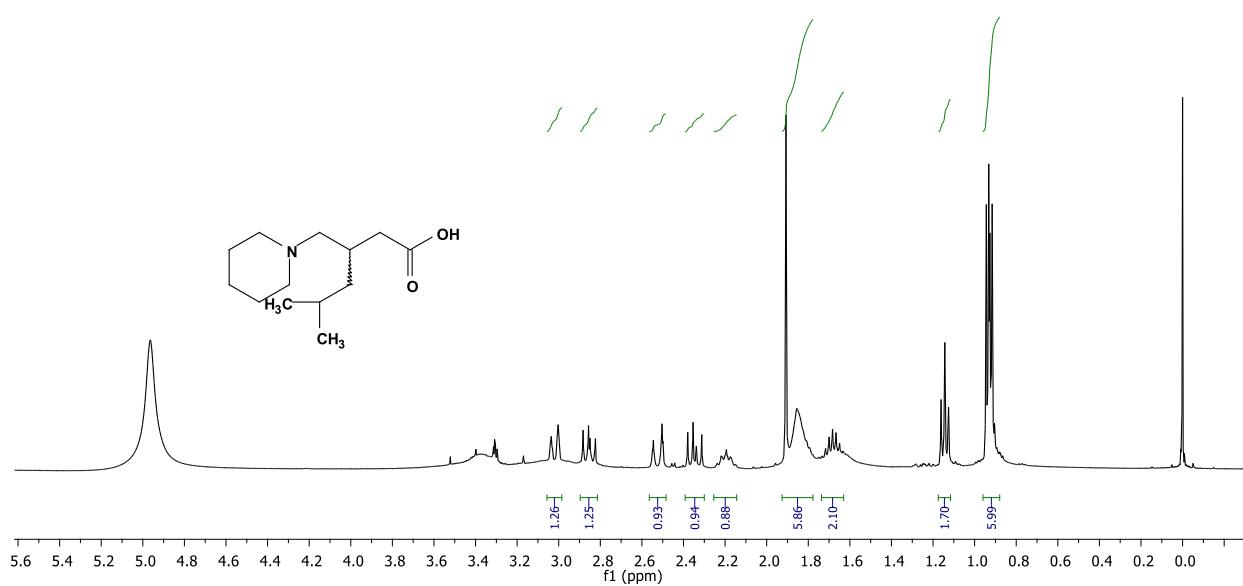

**Figure 16S.** <sup>1</sup>H NMR (400 MHz, CD<sub>3</sub>OD) of 5-methyl-3-(piperidin-1-ylmethyl)hexanoic acid (**8b**).

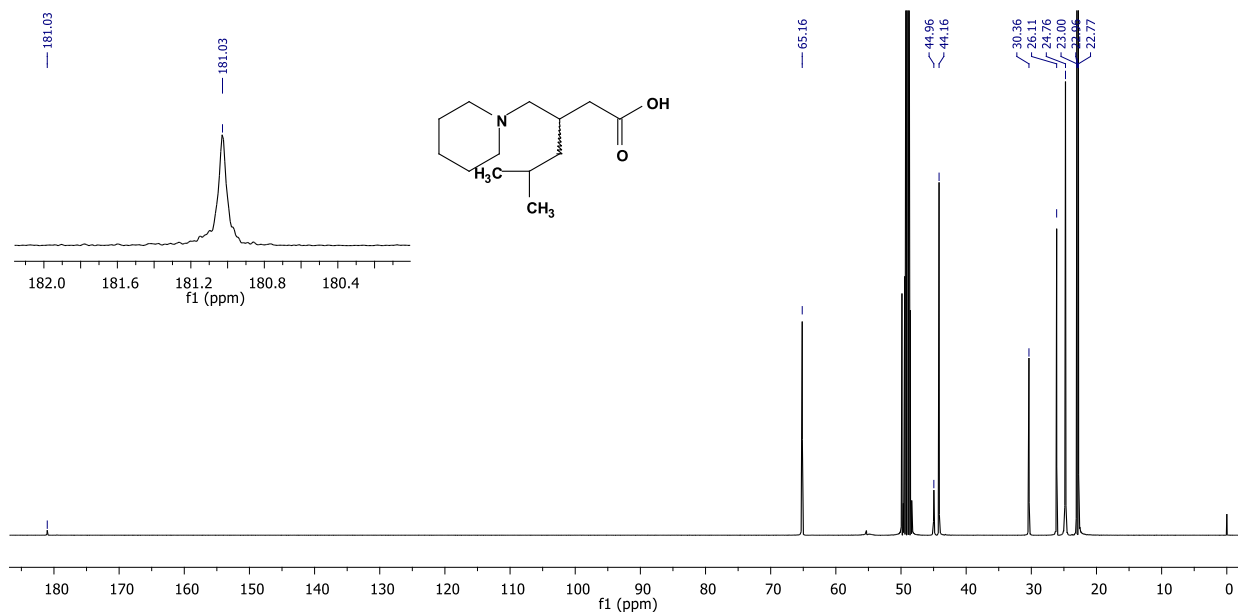

**Figure 17S.** <sup>13</sup>C NMR (100 MHz, CD<sub>3</sub>OD) of 5-methyl-3-(piperidin-1-ylmethyl)hexanoic acid (**8b**).

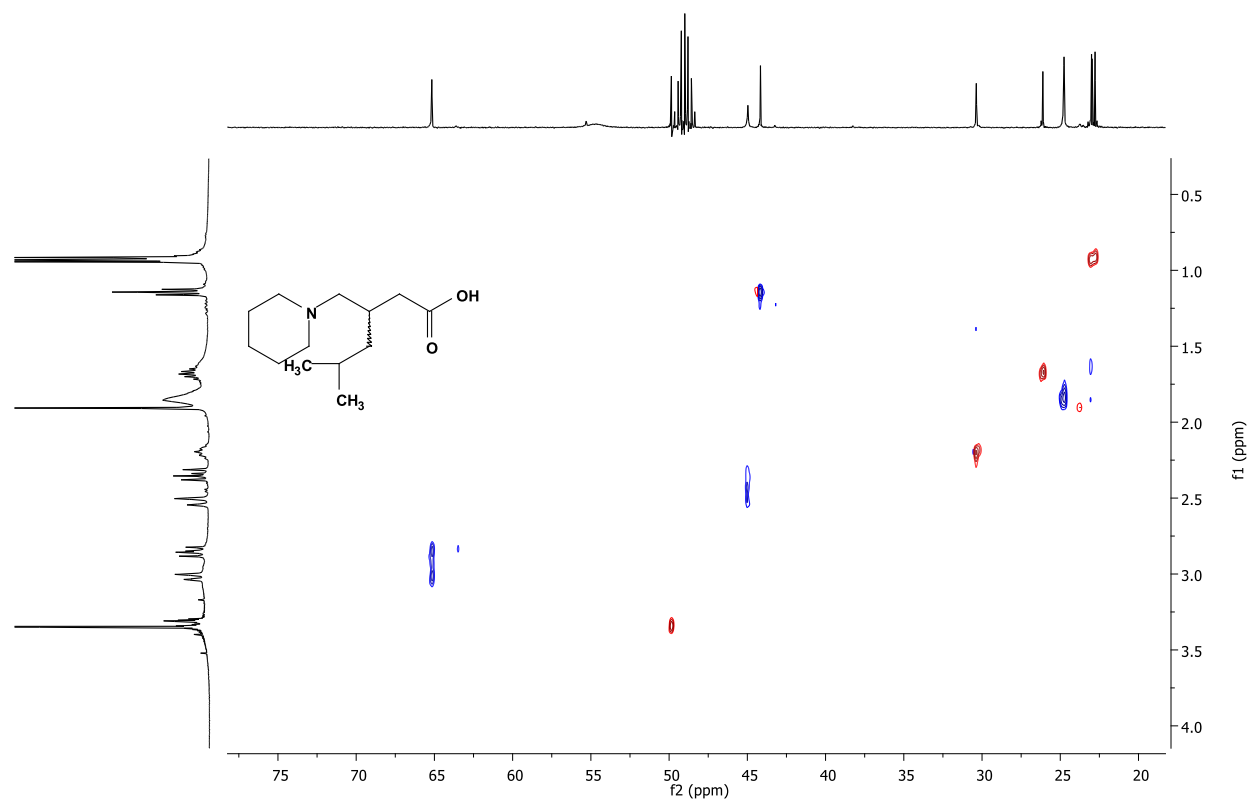

**Figure 18S.** 2D NMR (HETCOR 400 MHz, CD<sub>3</sub>OD) of 5-methyl-3-(piperidin-1-ylmethyl) hexanoic acid (**8b**).

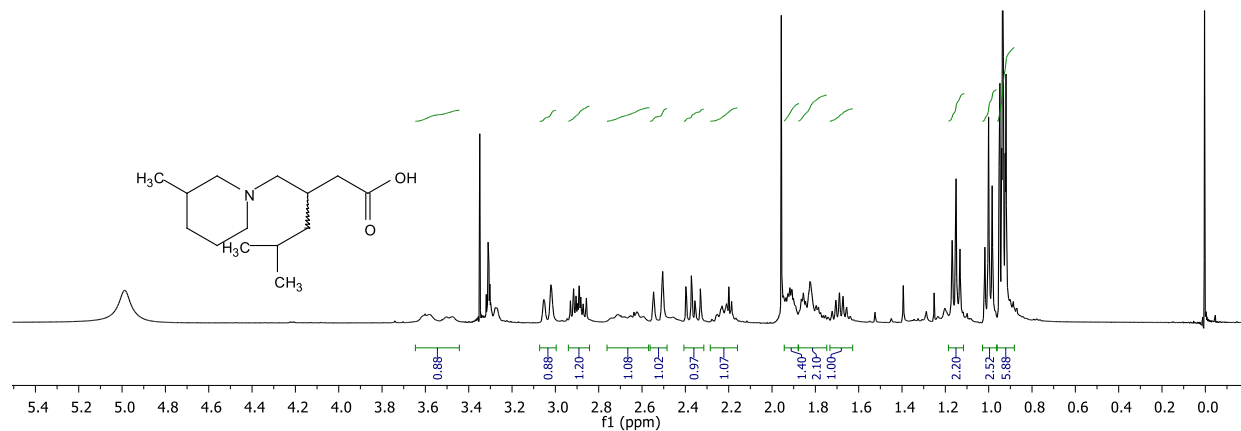

**Figure 19S.**  $^1\text{H}$  NMR (400 MHz,  $\text{CD}_3\text{OD}$ ) of 5-methyl-3-((3-methylpiperidin-1-yl)methyl)hexanoic acid (8c).

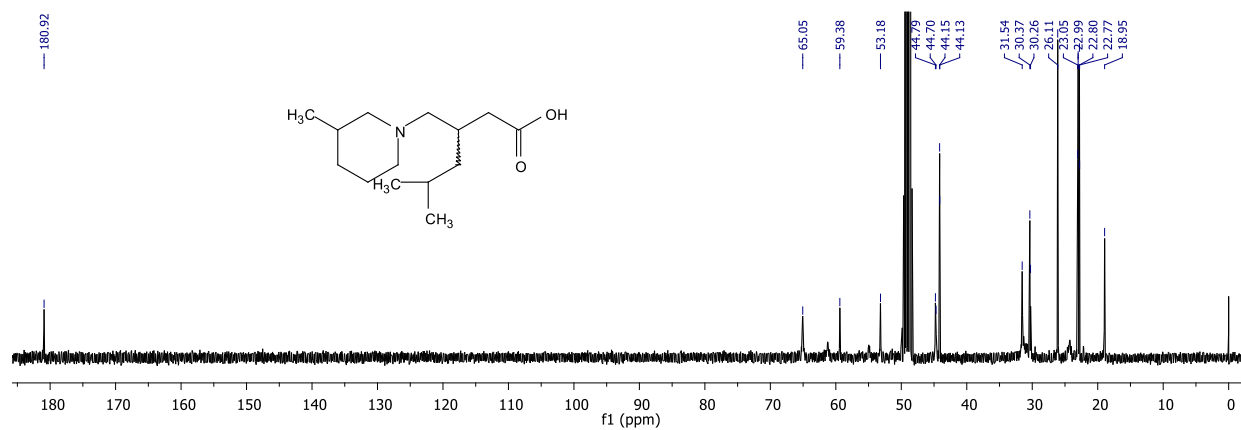

**Figure 20S.**  $^{13}\text{C}$  NMR (100 MHz,  $\text{CD}_3\text{OD}$ ) of 5-methyl-3-((3-methylpiperidin-1-yl)methyl)hexanoic acid (8c).

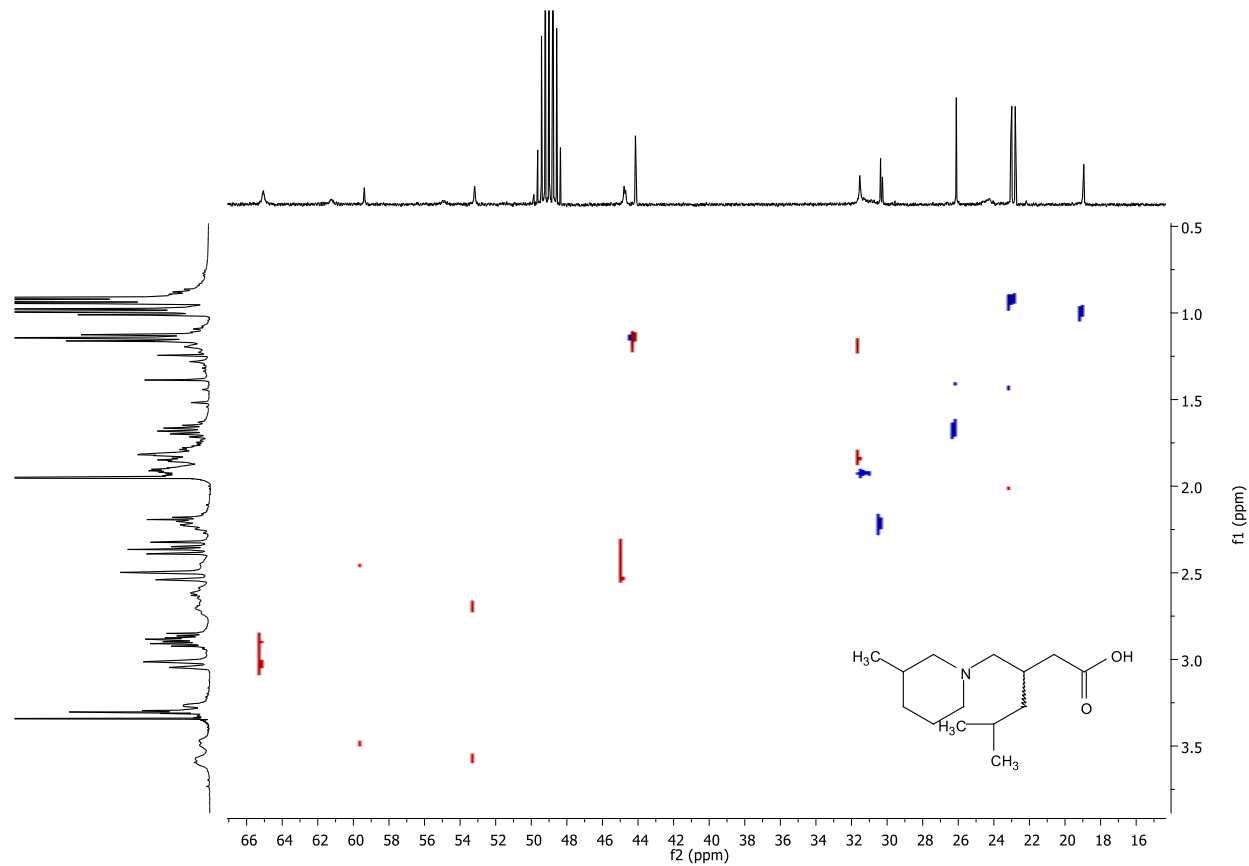

**Figure 21S.** 2D NMR (HETCOR 400 MHz, CD<sub>3</sub>OD) of 5-methyl-3-((3-methylpiperidin-1-yl)methyl)hexanoic acid (**8c**).

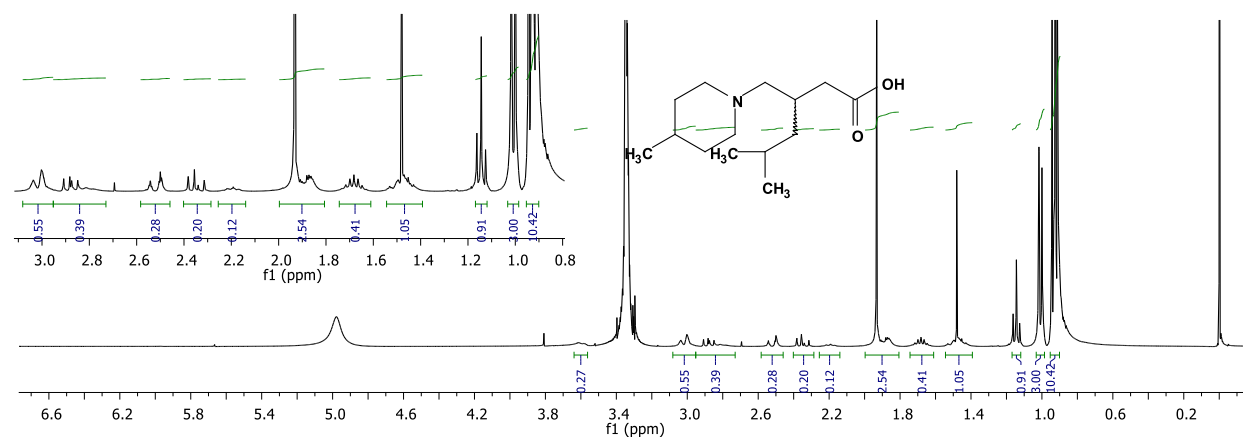

**Figure 22S.** <sup>1</sup>H NMR (400 MHz, CD<sub>3</sub>OD) of 5-methyl-3-((4-methylpiperidin-1-yl)methyl)hexanoic acid (**8d**).

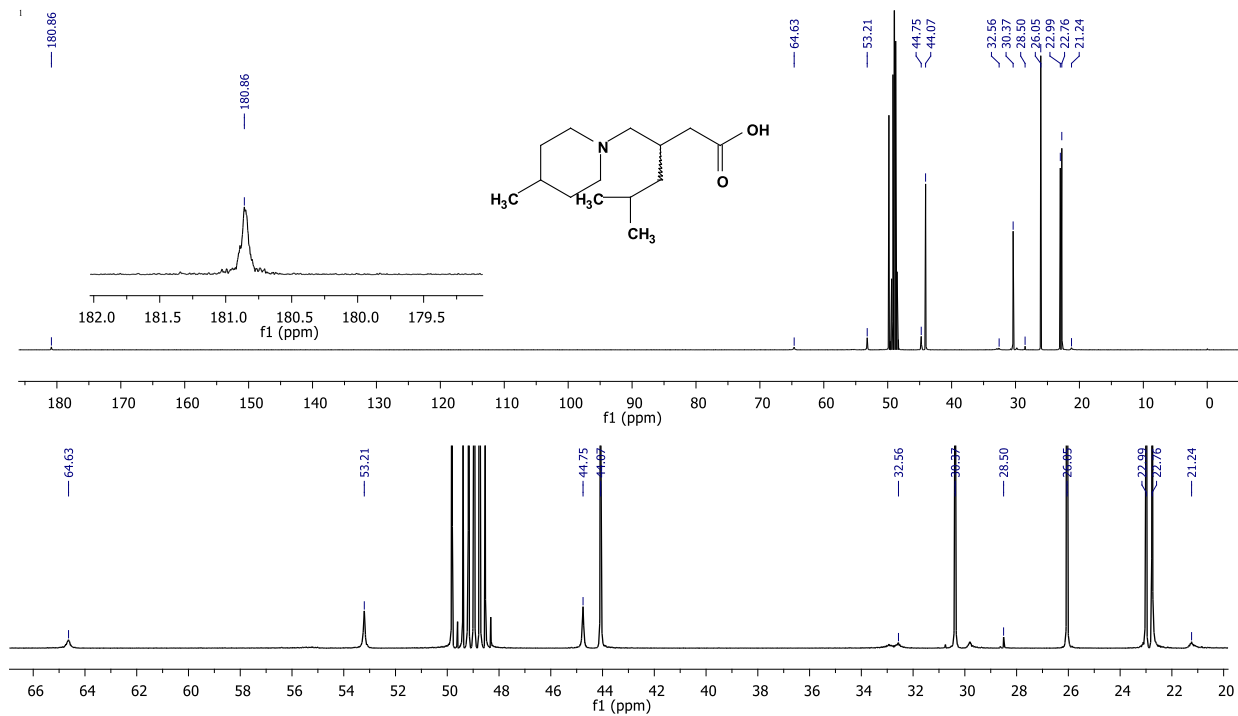

**Figure 23S.** <sup>13</sup>C NMR (100 MHz, CD<sub>3</sub>OD) of 5-methyl-3-((4-methylpiperidin-1-yl)methyl)hexanoic acid (8d).

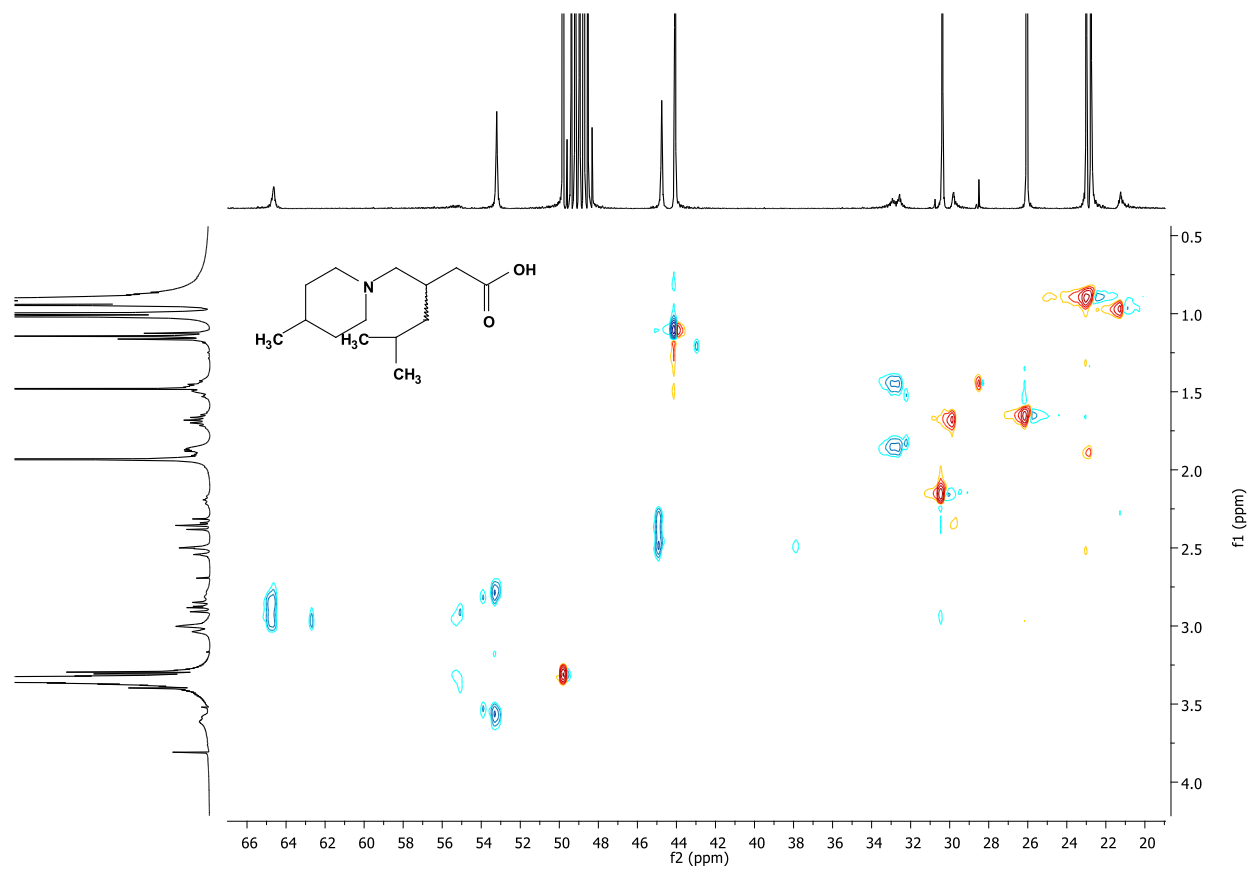

**Figure 24S.** 2D NMR (HETCOR 400 MHz,  $\text{CD}_3\text{OD}$ ) of 5-methyl-3-((4-methylpiperidin-1-yl)methyl)hexanoic acid (**8d**).

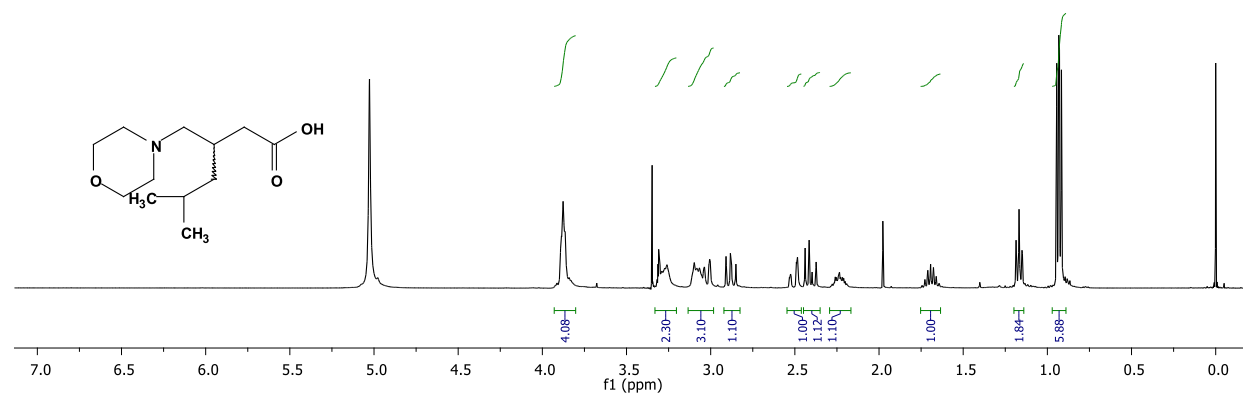

**Figure 25S.**  $^1\text{H}$  NMR (400 MHz,  $\text{CD}_3\text{OD}$ ) of 5-methyl-3-(morpholinomethyl) hexanoic acid (**8e**).



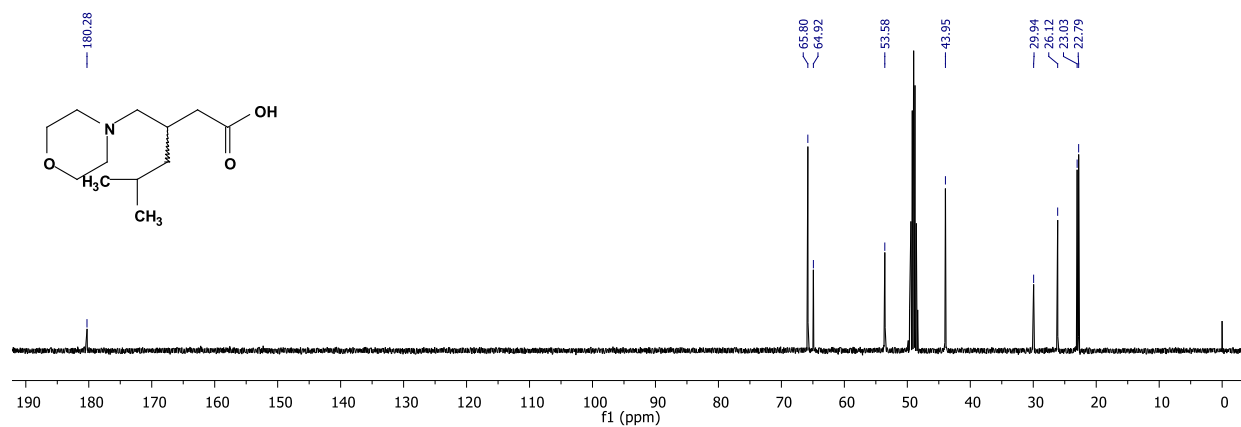

Figure 26S. <sup>13</sup>C NMR (100 MHz, CD<sub>3</sub>OD) of 5-methyl-3-(morpholinomethyl)hexanoic acid (8e).

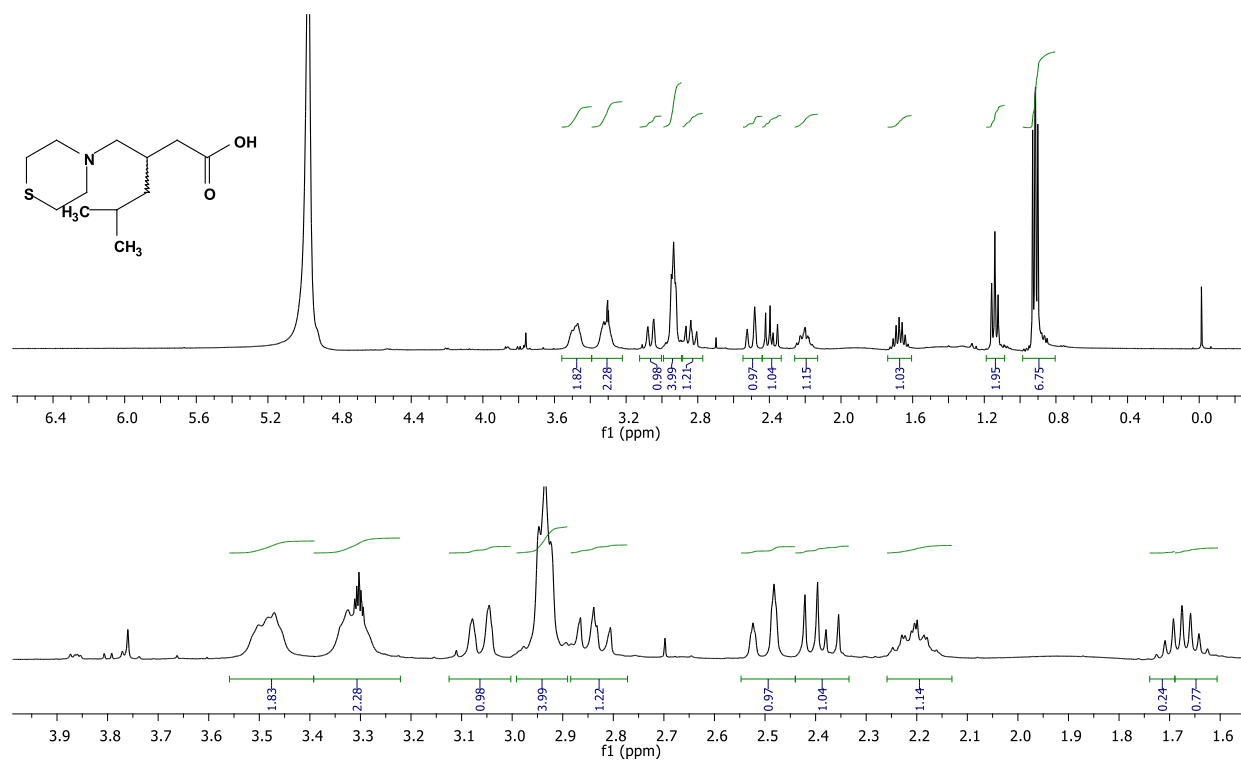

Figure 27S. <sup>1</sup>H NMR (400 MHz, CD<sub>3</sub>OD) of 5-methyl-3-(thiomorpholinomethyl)hexanoic acid (8e).

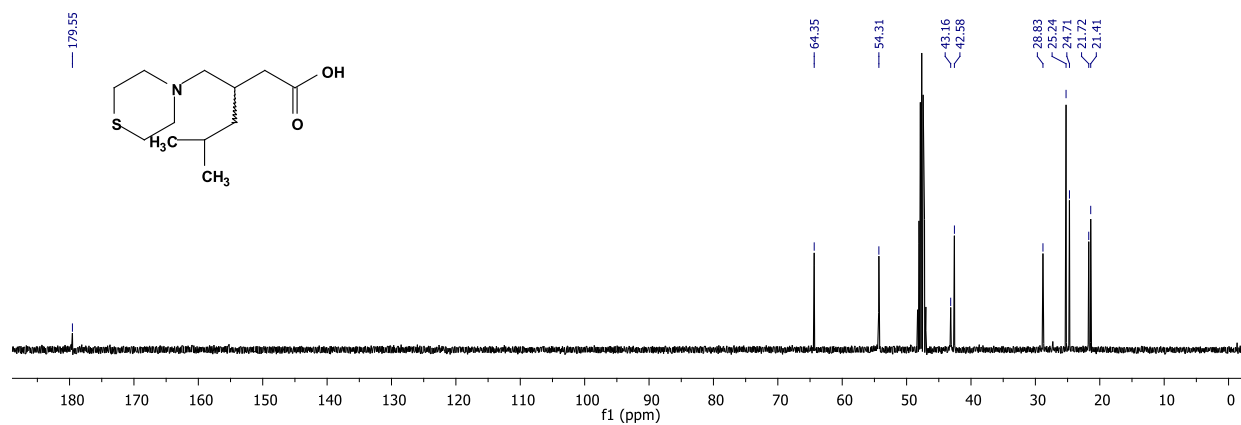

Figure 28S. <sup>13</sup>C NMR (100 MHz, CD<sub>3</sub>OD) of 5-methyl-3-(thiomorpholinomethyl)hexanoic acid (8f).

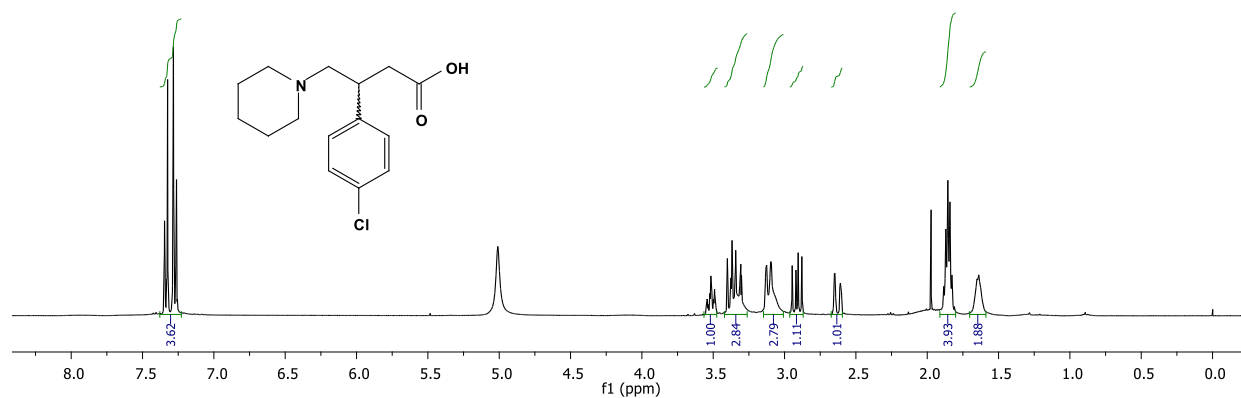

Figure 29S. <sup>1</sup>H NMR (400 MHz, CD<sub>3</sub>OD) of 3-(4-chlorophenyl)-4-(piperidin-1-yl)butanoic acid (9b).

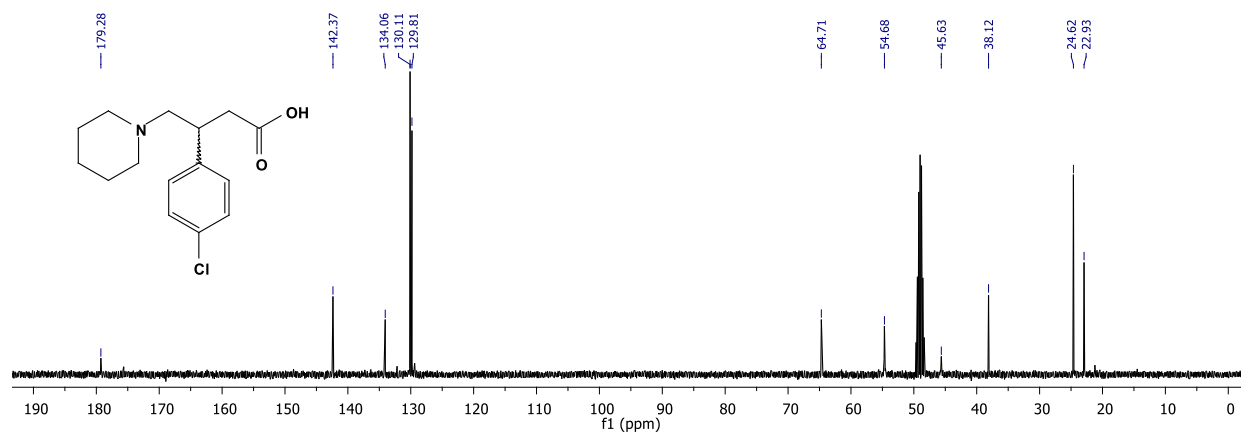

Figure 30S. <sup>13</sup>C NMR (100 MHz, CD<sub>3</sub>OD) of 3-(4-chlorophenyl)-4-(piperidin-1-yl)butanoic acid (9b).

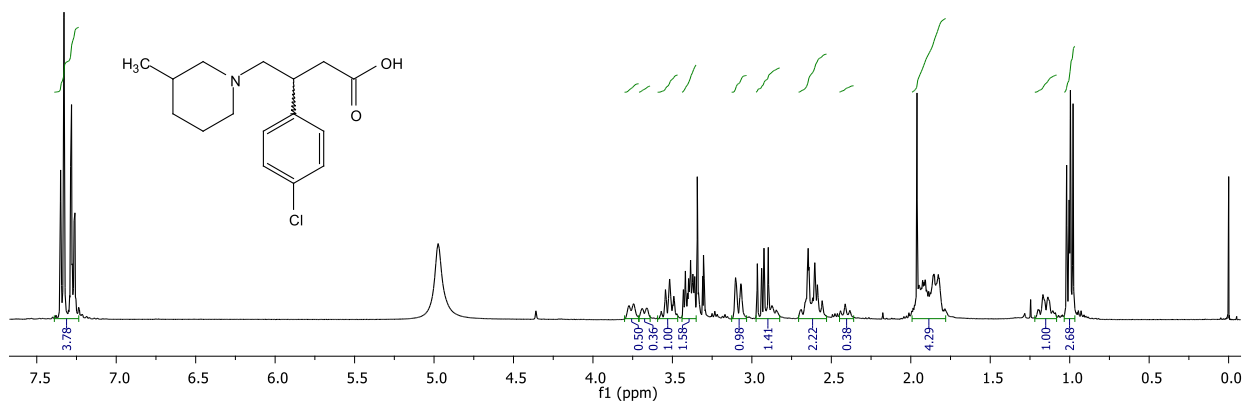

**Figure 31S.** <sup>1</sup>H NMR (400 MHz, CD<sub>3</sub>OD) of 3-(4-chlorophenyl)-4-(3-methylpiperidin-1-yl)butanoic acid (9c).

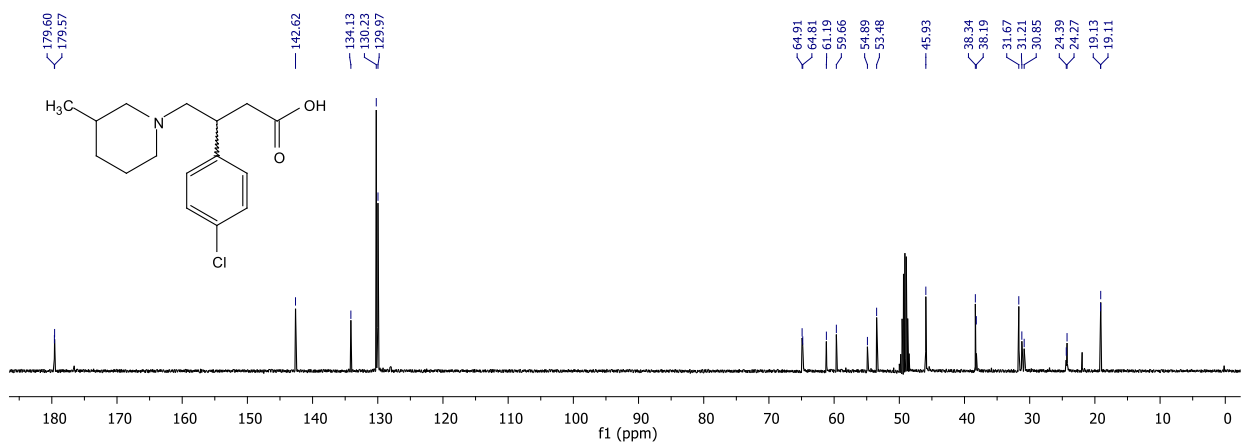

**Figure 32S.** <sup>13</sup>C NMR (100 MHz, CD<sub>3</sub>OD) of 3-(4-chlorophenyl)-4-(3-methylpiperidin-1-yl)butanoic acid (9c).

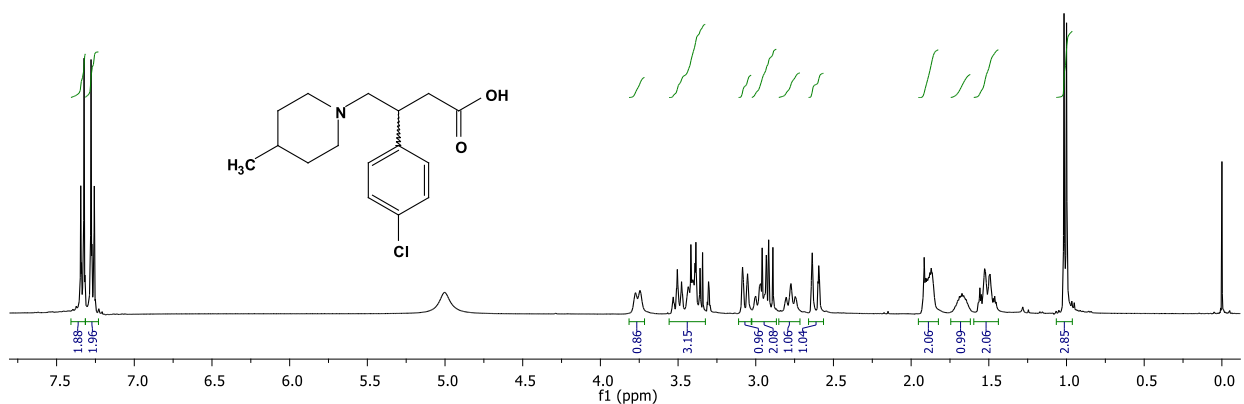

**Figure 33S.** <sup>1</sup>H NMR (400 MHz, CD<sub>3</sub>OD) of 3-(4-chlorophenyl)-4-(4-methylpiperidin-1-yl)butanoic acid (9d).

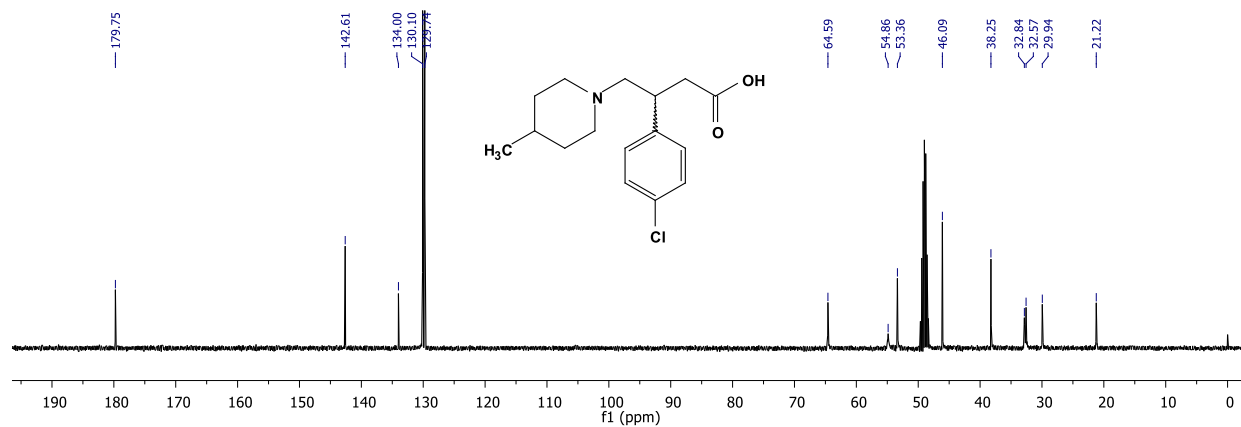

**Figure 34S.** <sup>13</sup>C NMR (100 MHz, CD<sub>3</sub>OD) of 3-(4-chlorophenyl)-4-(4-methylpiperidin-1-yl)butanoic acid (9d).

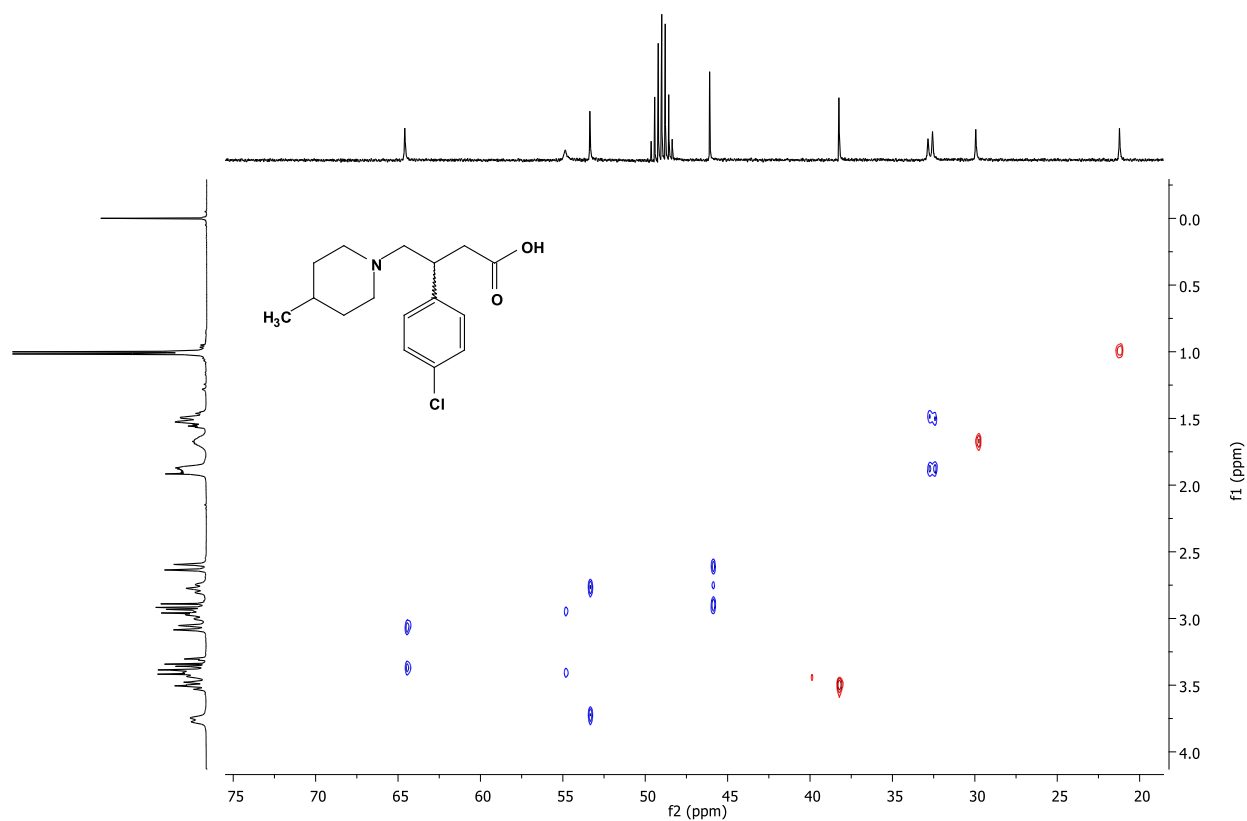

**Figure 35S.** 2D NMR (HETCOR 400 MHz, CD<sub>3</sub>OD) of 3-(4-chlorophenyl)-4-(4-methylpiperidin-1-yl)butanoic acid (9d).

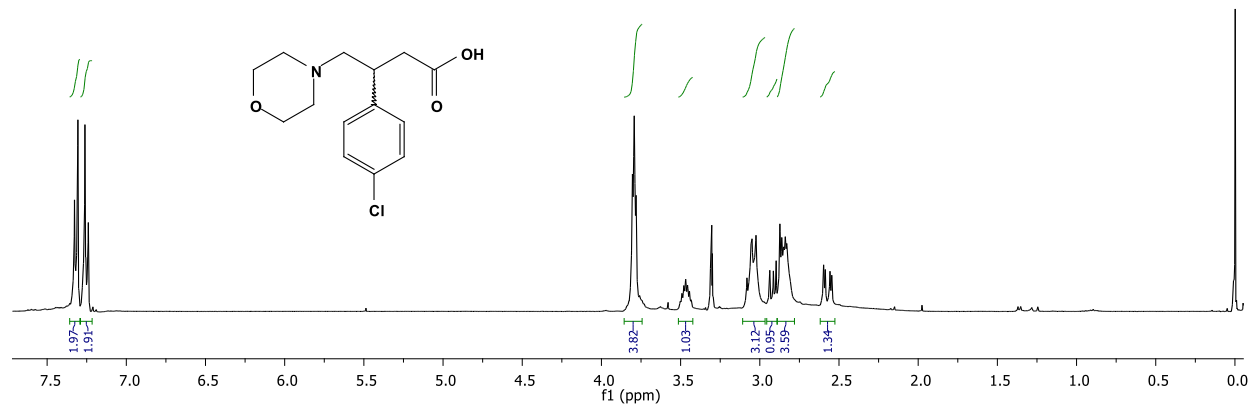

Figure 36S. <sup>1</sup>H NMR (400 MHz, CD<sub>3</sub>OD) of 3-(4-chlorophenyl)-4-morpholinobutanoic acid (9e).

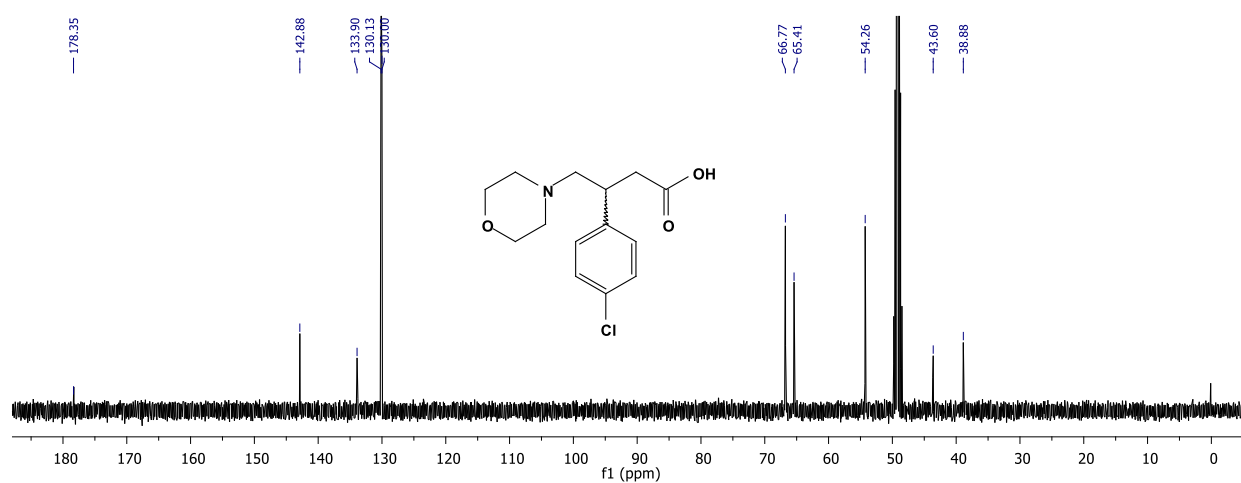

Figure 37S. <sup>13</sup>C NMR (100 MHz, CD<sub>3</sub>OD) of 3-(4-chlorophenyl)-4-morpholinobutanoic acid (9e).

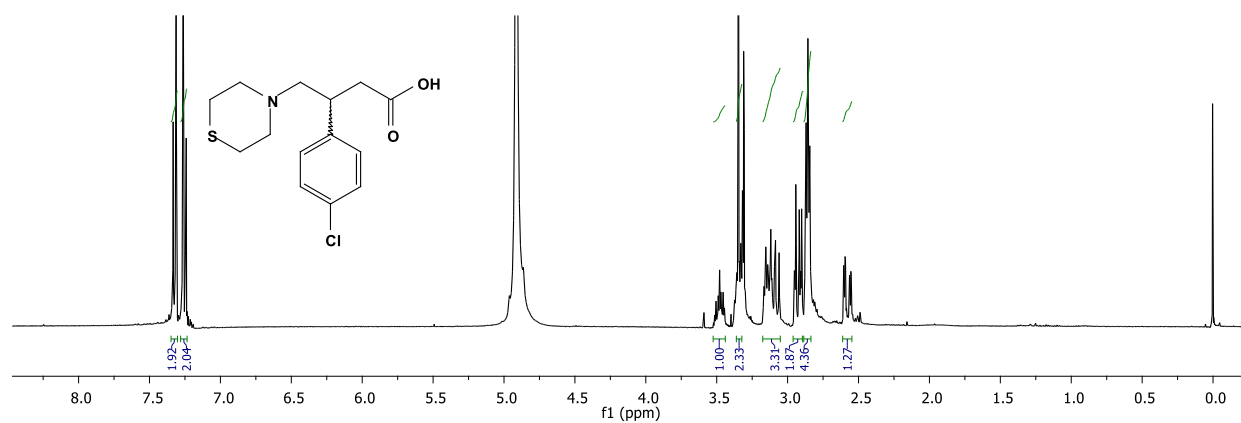

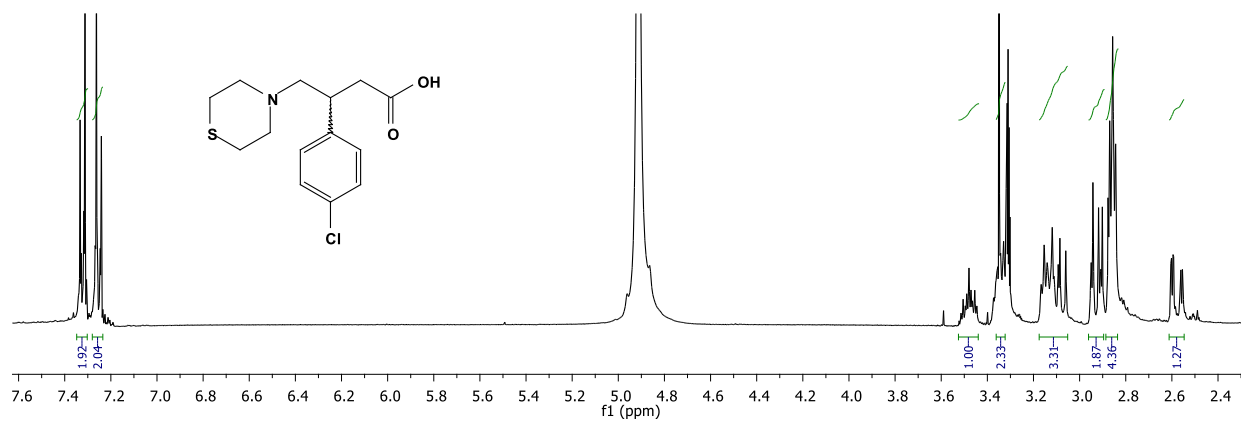

**Figure 38S.** <sup>1</sup>H NMR (400 MHz, CD<sub>3</sub>OD) of 3-(4-chlorophenyl)-4-thiomorpholinobutanoic acid (9f).

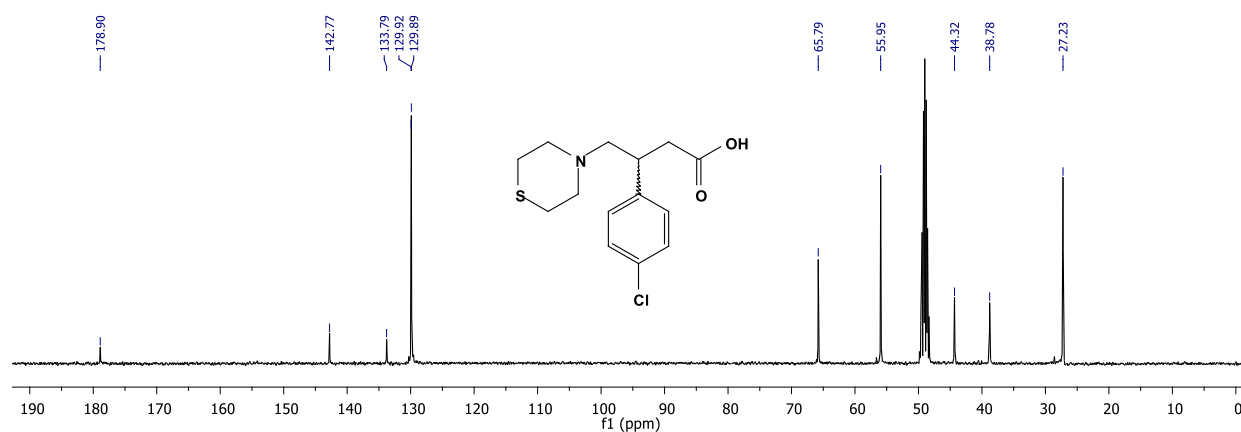

**Figure 39S.** <sup>13</sup>C NMR (100 MHz, CD<sub>3</sub>OD) of 3-(4-chlorophenyl)-4-thiomorpholinobutanoic acid (9f).

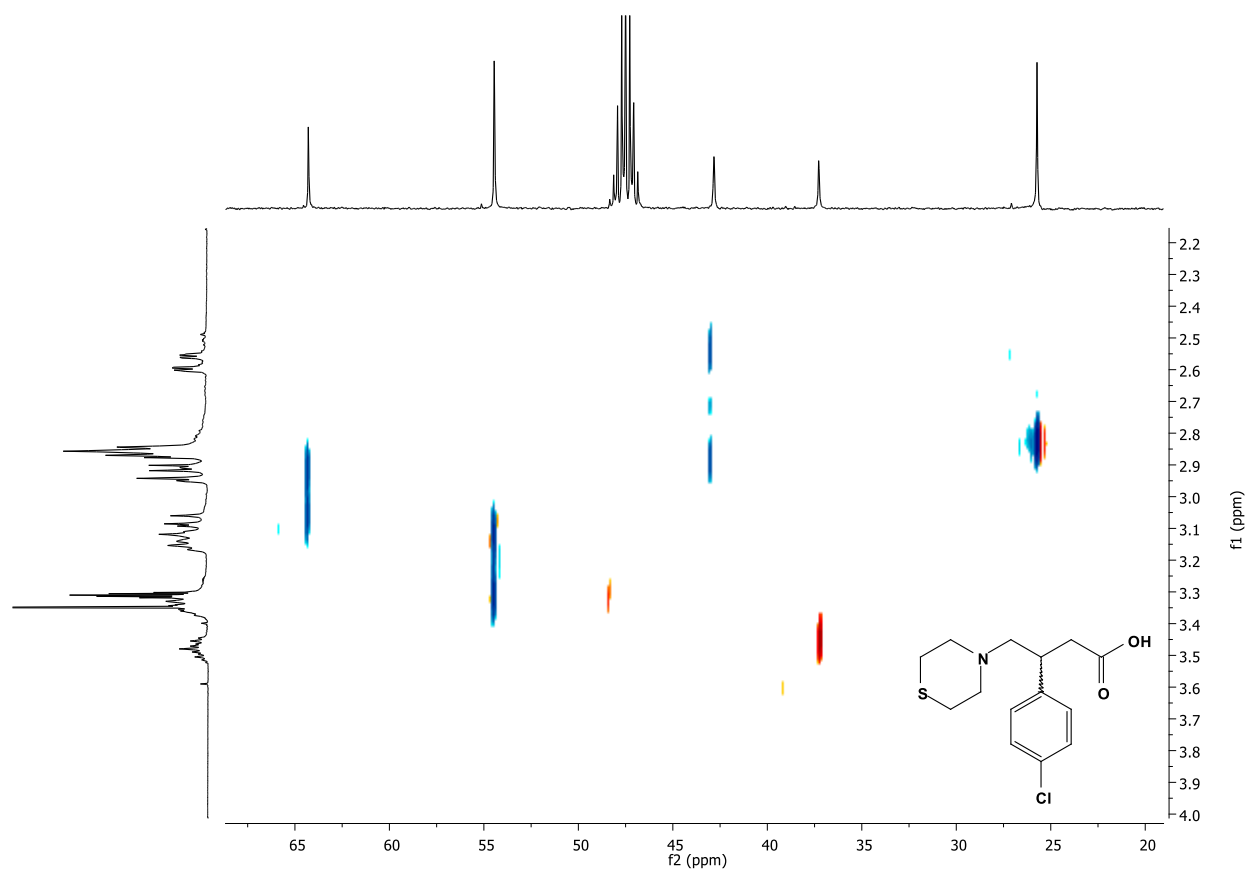

**Figure 40S.** 2D NMR (HETCOR 400 MHz, CD<sub>3</sub>OD) of 3-(4-chlorophenyl)-4-thiomorpholinobutanoic acid (9f).

## Computational Details

```
PF -----MSNKTNASLMKRREAAVPRGVGQIHP-IFAESAKNATVTDVEGREFID
EC -----NSNKELMQRRSQAI PRGVGQIHPI-FADRAENCRVWDVEGREYLD
HS -FDYDGPLMKTEVPGPRSQELMKQLNII--QNAEAVHFFCNYEESRGNYLVDVDGNRMLD
JB -FDYDGPLMKTEVPGPRSRELMKQLNII--QNAEAVHFFCNYEESRGNYLVDVDGNRMLD

PF FAGGIAAVLNTGHLHPKIIAAVTEQLNKLTH---TCFQVLAYEPYVELCEKVNAK-VPGDF
EC FAGGIAAVLNTGHLHPKVVA AVEAQLKKLSH---TCFQVLAYEPYLELCEI-MNQKVPGDF
HS LYSQISSVPIGYSHPALLKLIQQPQNASMFVNRPALGILPPENFVEKLRQSLLSVAPKGM
JB LYSQISSIPIGYSHPALVKLVQQPQNVSTFINRPALGILPPENFVEKLRSLLSVAPKGM

PF AKKTLLVTTGSEA-----VENAVKIARATTGRAGVIAFT
EC AKKTLLVTTGSEAVENA-----VKIARAATKRSGTIAFS
HS -SQLITMACGSCSNENALKTIFMWYRSKERGQRGFSQEELETCMINQAPGCPDYSILSFM
JB -SQLITMACGSCSNENAFKTIFMWYRSKERGESAFSKEELETCMINQAPGCPDYSILSFM

PF GAYHRTMMTLGLTGKVVPYSAGMGLM--P-GGIFRALYPNELHGVS-V---DDSIAS-I
EC GAYHRTHYTLALTGKVNPYSAGMGL---MPGHVYRALYPCPLHGI---SEDDAIASI-
HS GAFHRTMGCLATTHSKAIHKIDIPSFDWPIAPFPRLKYPLEEFVKENQQEEARCLEEVE
JB GAFHRTMGCLATTHSKAIHKIDIPSFDWPIAPFPRLKYPLEEFVKENQQEEARCLEEVE

PF ERIFKNDAEPRDIAAIIIEPVQGEGGFYVAPKAFMKRLRELCDKHGILLIADEVQTGAGR
EC HRIFKNDAAPEDIAAIVIEPVQGEGGFYASSPAFMQRLRALCDEHGIMLIADEVQSGAGR
HS DLIVKYRKKKKTVAGIIVEPIQSEGGDNHASDDFFRKLRDIARKHGCAFLVDEVQTGGGC
JB DLIVKYRKKKKTVAGIIVEPIQSEGGDNHASDDFFRKLRDISRKHGCAFLVDEVQTGGGS

PF TGTFFAMEQMGVAA--DLTTFAKSI-AGGFPLAGVCGKAEYMDAIAPGGLGGTYAGSPIA
EC TGTLFAMEQMGVAP--DLTTFAKSI-AGGFPLAGVTGRAEVMDAVAPGGLGGTYAGNPIA
HS TGKFWAHEHWGLDDPADVMTFSKKMMTGGFFH----K-EEFRPNAPYRIFNTWLGDPSK
JB TGKFWAHEHWGLDDPADVMTFSKKMMTGGFFH----K-EEFRPNAPYRIFNTWLGDPSK

PF CAAALAVMEVFEEHLLDRCKAVGERLVTGLKAIQAKYPVI-GEVRALGAMIAELFEDG
EC CVAALEVLKVFEQENLLQKANDLGQKLKDGLLAIAEKHPEI-GDVRGLGAMIAIELFEDG
HS NLLLAEVINIIKREDLLNNAAHAGKALLTGLLDLQARYPQFISRVRGRGTFCSFDT----
JB NLLLAEVINIIKREDLLSNAAHAGKVLLTGLLDLQARYPQFISRVRGRGTFCSFDT----

PF DSHKPNAAAVASVVAKARDKGLILLSCGTYGNVLRVLVPLTSPDEQLDKGLAIIIECFSEL-
EC DHNKPDAKLTAEIVARARDKGLILLSCGPYYNVLRILVPLTIEDAQIRQGLEIISQCFDEAK
HS ----PDDSIRNKLLILIARNKGVVLGCGDKSIRFRPTLVFRDHHA--HLFLNIFSDILADFK
JB ----PDESIRNKLISIARNKGVMLGGCGDKSIRFRPTLVFRDHHA--HLFLNIFSDILADFK
```

**Figure 41S.** Alignment of *pseudomonas fluorescens* (PF), human (HS), *E. coli* (EC) and wild boar (JB). Red and blue color letters correspond to the residues of the chain A and chain B respectively, that interact with VGB 3 in the 1ohv crystal structure.



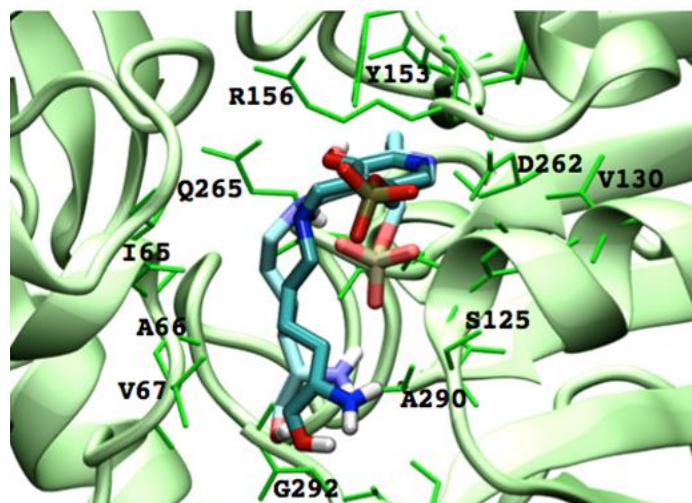

**Figure 42S.** Validation of the molecular docking calculation for the *pseudomonas* model. Ligand in the PDB:ID 3r4t crystal structure was reproduced with a RMSD of 1.7 Å. Ligand experimental (opaque color) and calculated conformation (shiny color) are displayed as sticks representation respectively. Residues within 4.0 Å of both ligands are shown as thin sticks.

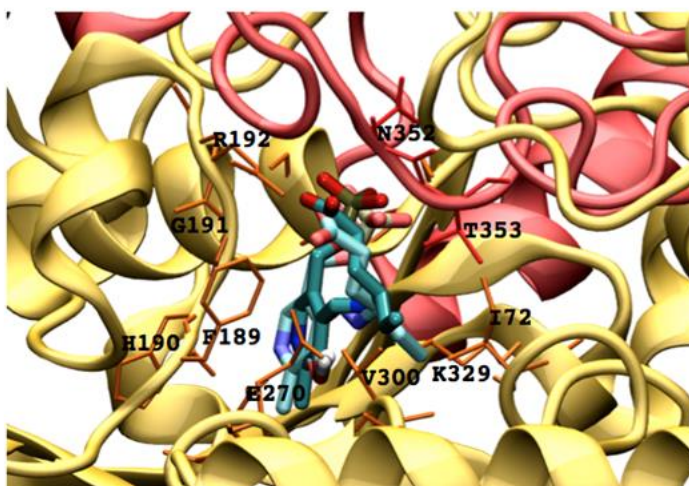

**Figure 43S.** Validation of the molecular docking calculation for the *human* model. Ligand in the PDB:ID 1ohw crystal structure was reproduced with a RMSD of 1.3 Å. Ligand experimental (opaque color) and calculated conformation (shiny color) are displayed as sticks representation respectively. Residues within 4.0 Å of both ligands are shown as thin sticks.

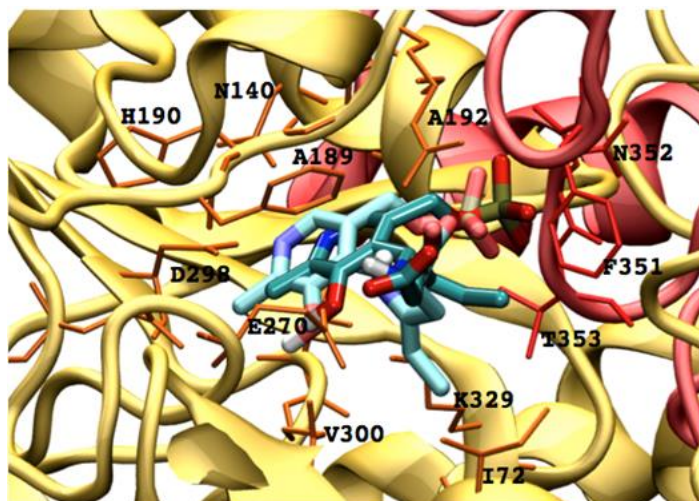

**Figure 44S.** Validation of the molecular docking calculation for the *human* model. Ligand in the PDB:ID 1ohy crystal structure was reproduced with a RMSD of 1.8 Å. Ligand experimental (opaque color) and calculated conformation (shiny color) are displayed as sticks representation respectively. Residues within 4.0 Å of both ligands are shown as thin sticks.

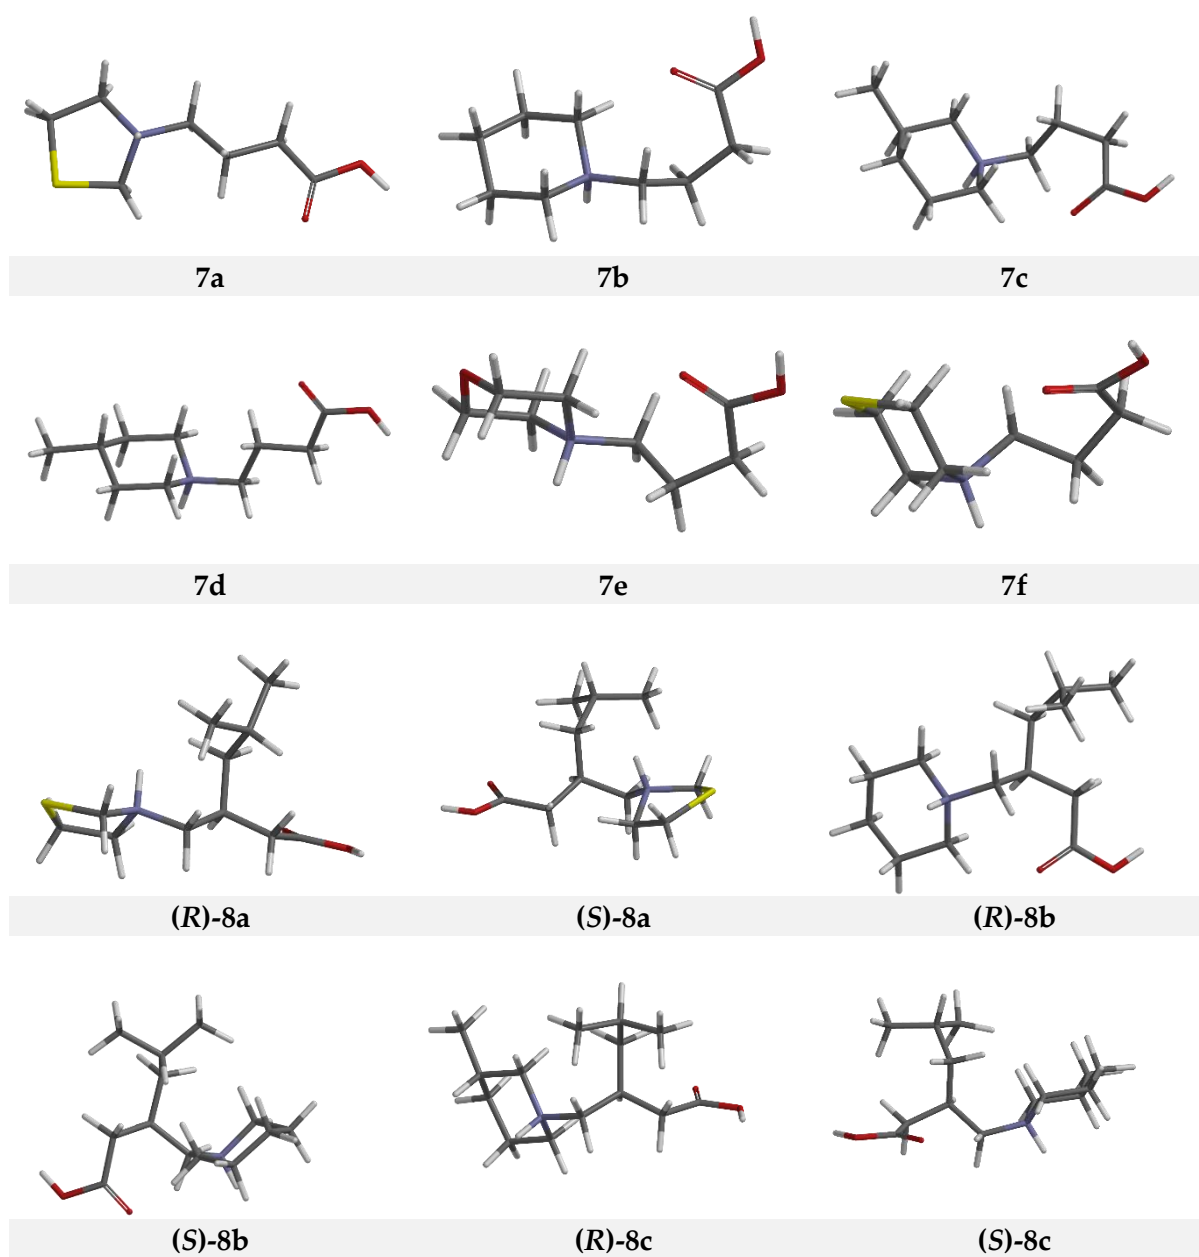

**Figure 45S.** Optimized structures of all GABA analogues, VPNa and VGB.

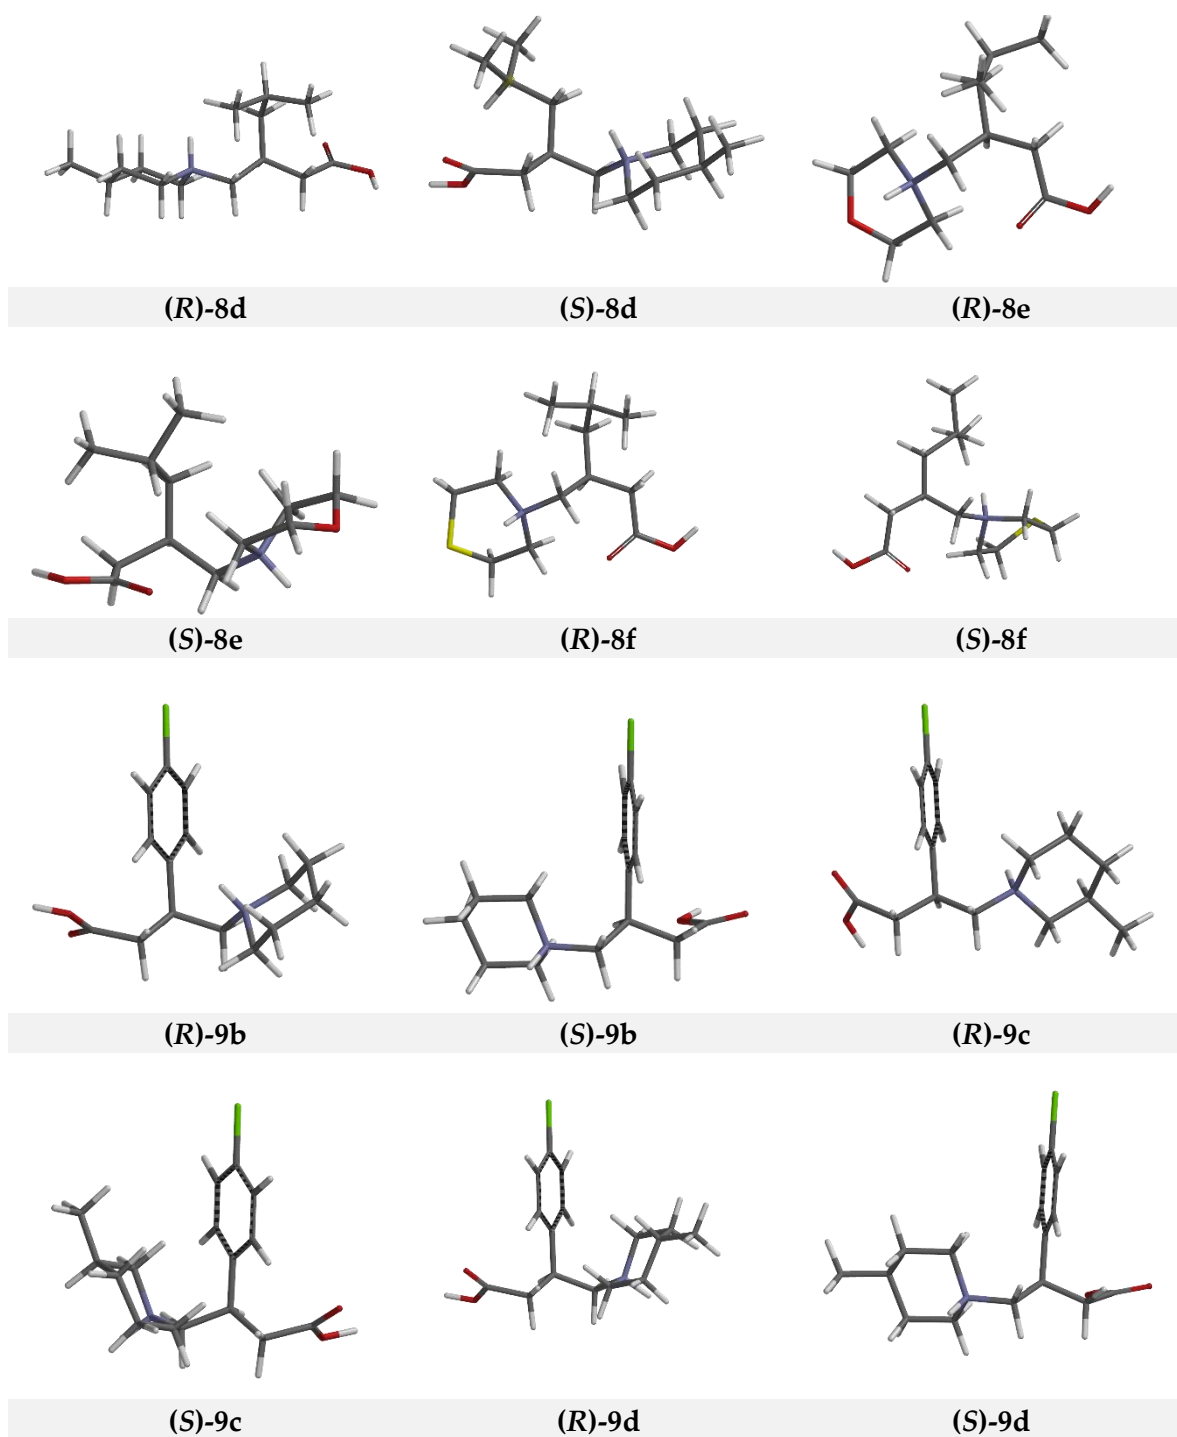

Figure 45S. Optimized structures of all GABA analogues, VPNa and VGB. Continuation

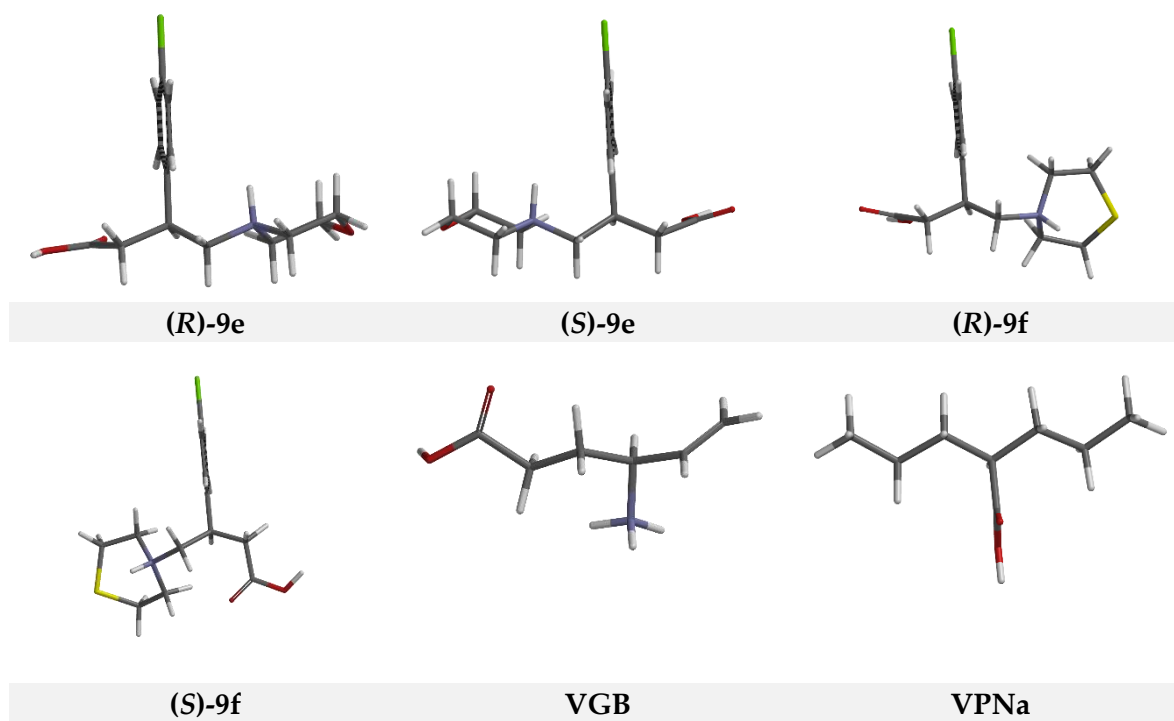

**Figure 45S.** Optimized structures of all GABA analogues, VPNa and VGB. Continuation

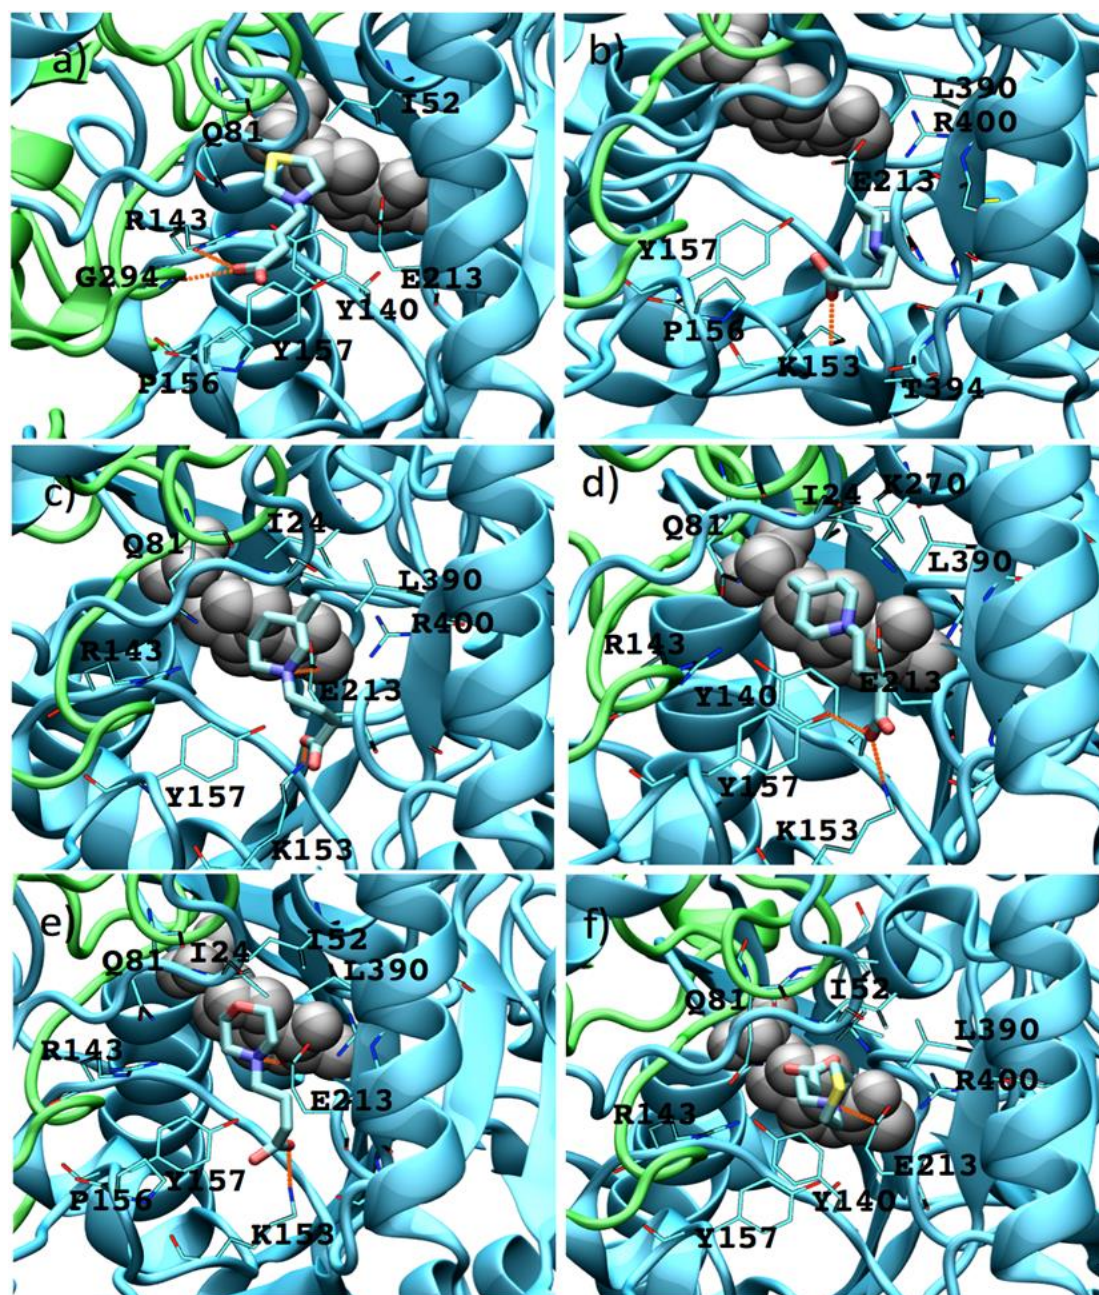

**Figure 46S.** Interactions between GABA analogues **7** and *Pseudomonas fluorescens* GABA-AT. a) **7a**, b) **7b**, c) **7c**, d) **7d**, e) **7e** and f) **7f**. PLP prosthetic group is showed as Van der Waals spheres and each protein chain is colored in green and cyan. Residues at 4 Å of each analogue are indicated. Hydrogen bonds are shown as orange dashed lines.

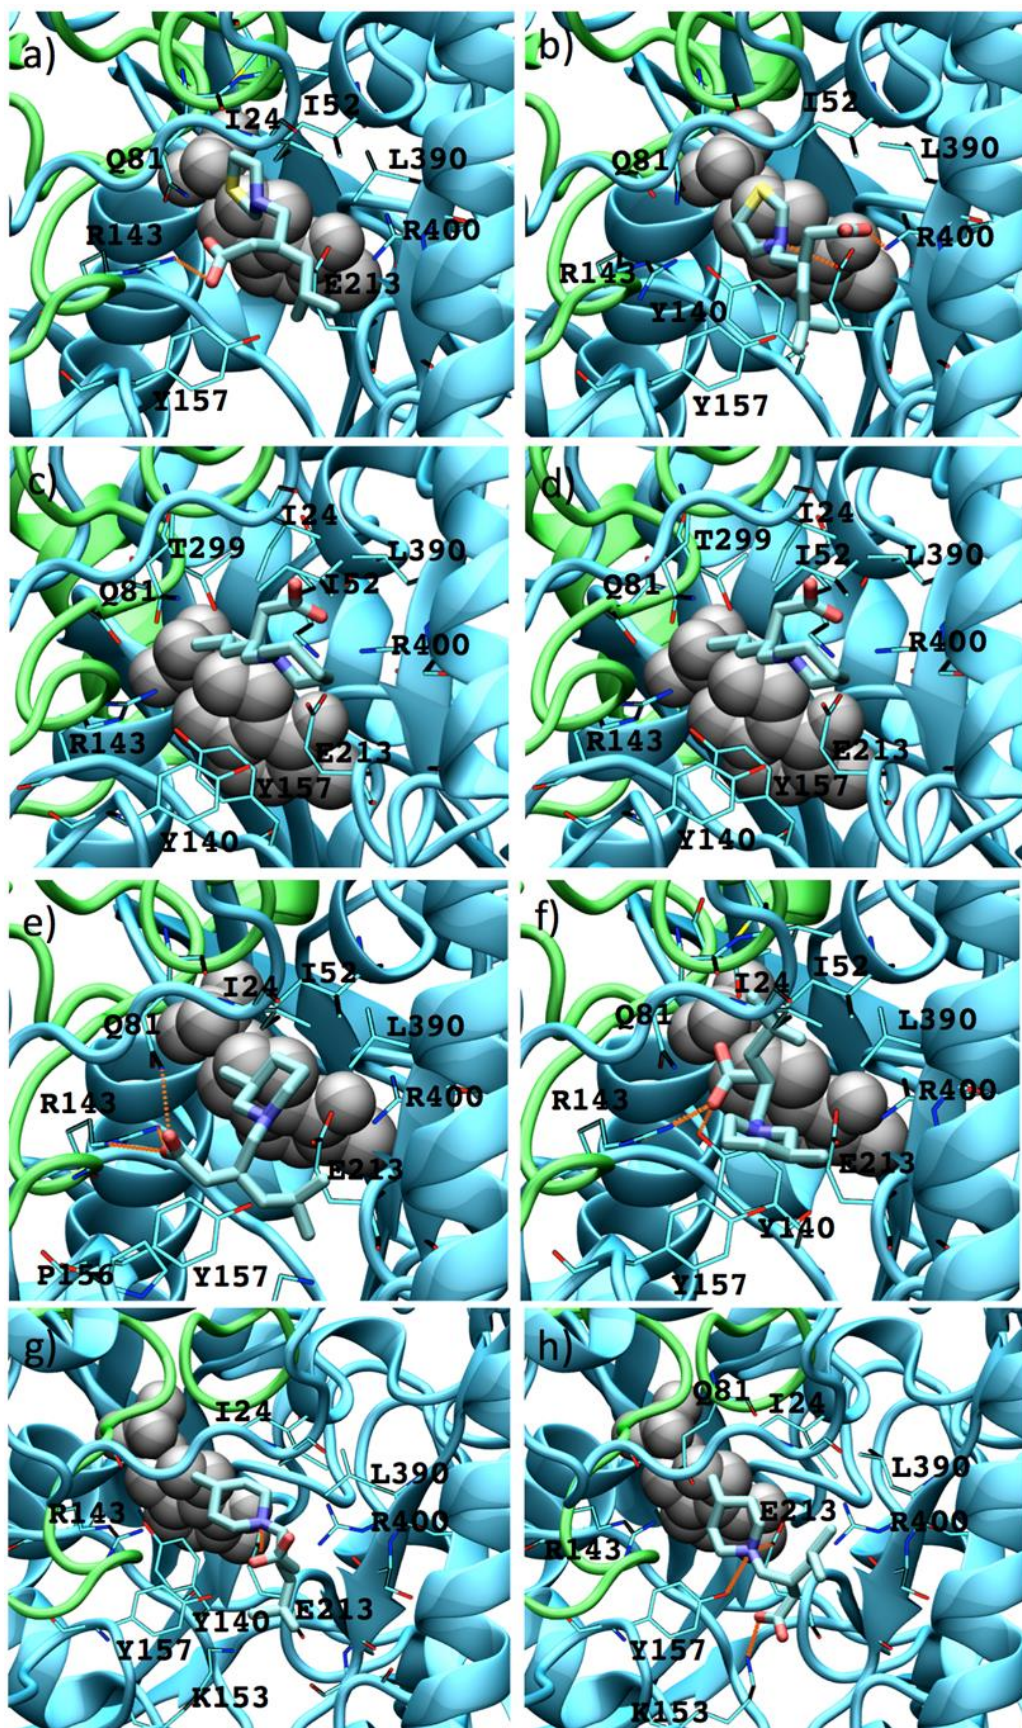

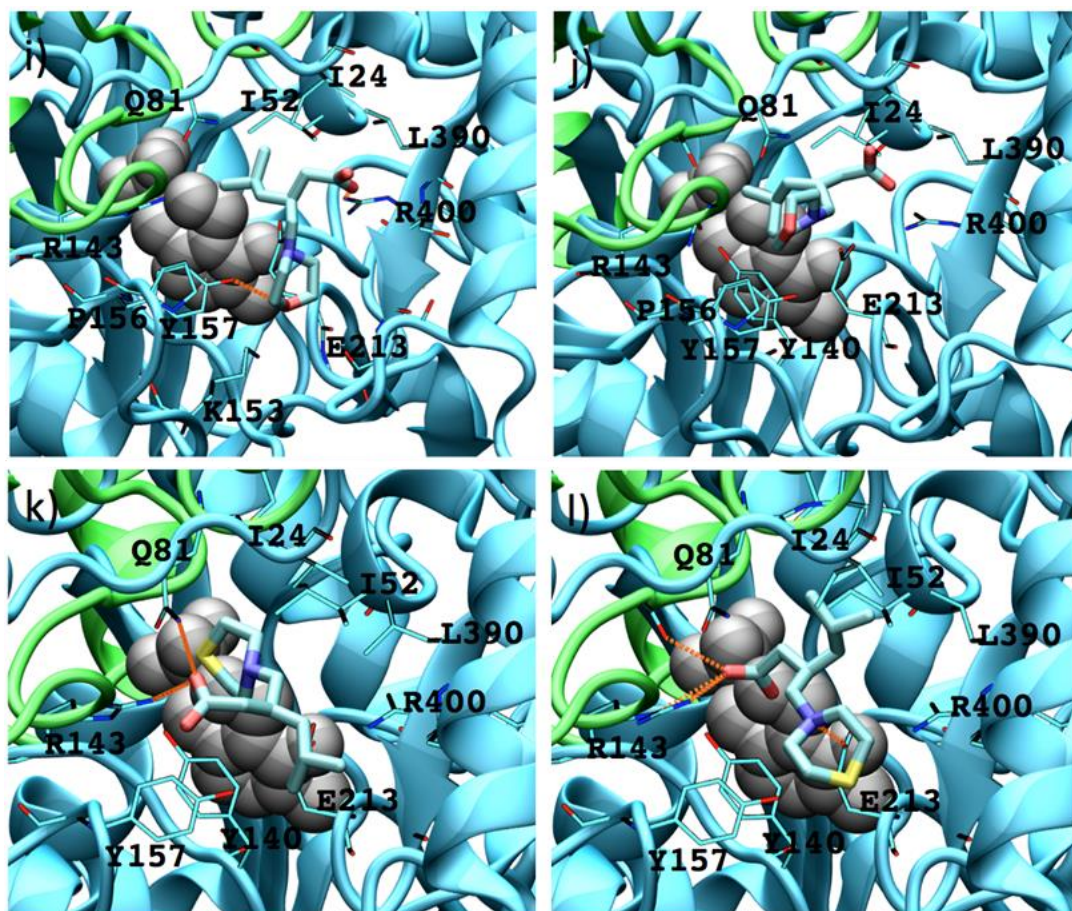

**Figure 47S.** Interactions between GABA analogues **8** and *Pseudomonas fluorescens* GABA-AT. a) (S)-**8a**, b) (R)-**8a**, c) (S)-**8b**, d) (R)-**8b**, e) (S)-**8c** and f) (R)-**8c**, g) (S)-**8d**, h) (R)-**8d**, i) (S)-**8e**, j) (R)-**8e**, k) (S)-**8f**, l) (R)-**8f**. PLP prosthetic group is shown as Van der Waals spheres and each protein chain is colored in green and cyan. Residues at 4 Å of each analogue are indicated. Hydrogen bonds are shown as orange dashed lines.



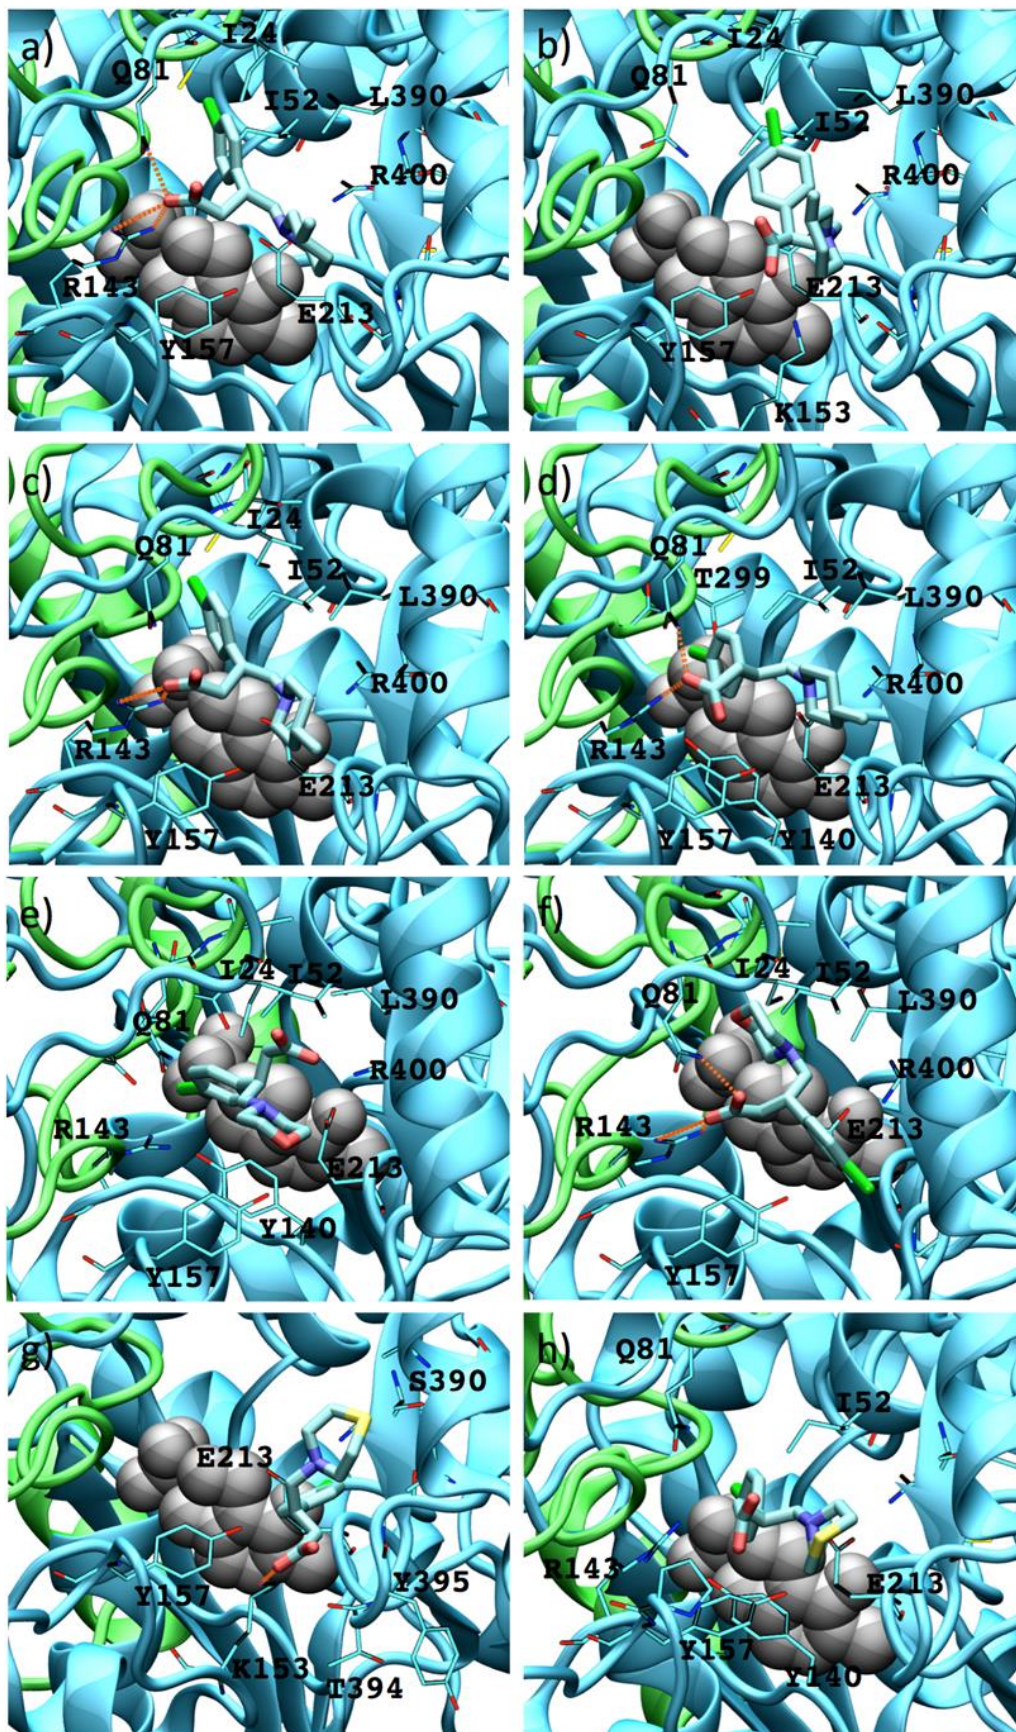

**Figure 48S.** Interactions between GABA analogues **9** and *Pseudomonas fluorescens* GABA-AT. a) (S)-**9c**, b) (R)-**9c**, c) (S)-**9d** and d) (R)-**9d**, e) (S)-**9e**, f) (R)-**9e**, g) (S)-**9f**, h) (R)-**9f**. PLP prosthetic group is showed as Van der Waals spheres and each protein chain is colored in green and cyan. Residues at 4 Å of each analogue are indicated. Hydrogen bonds are shown as orange dashed lines.

**Table 1S.** Energy interactions values obtained from the docking calculations of all GABA derivatives and *pseudomonas* GABA-AT model. All the values are in kcal/mol.

| Ligand         | MolDock Score | Electro   | HBond    |
|----------------|---------------|-----------|----------|
| <b>7a</b>      | -73.1062      | -7.11035  | -2.65911 |
| <b>7b</b>      | -69.4043      | -3.21553  | -7.4961  |
| <b>7c</b>      | -63.4051      | -8.18821  | -3.26379 |
| <b>7d</b>      | -88.9465      | -5.28229  | -5.17495 |
| <b>7e</b>      | -81.1331      | -10.6664  | -5.7402  |
| <b>7f</b>      | -82.0854      | -9.3513   | -8.95745 |
| (S)- <b>8a</b> | -88.4367      | -7.59611  | -2.37557 |
| (R)- <b>8a</b> | -80.2747      | -4.34932  | -1.54938 |
| (S)- <b>8b</b> | -95.13        | -3.82411  | -3.42391 |
| (R)- <b>8b</b> | -82.2497      | -1.10123  | -9.99797 |
| (S)- <b>8c</b> | -106.003      | -11.4722  | -6.60934 |
| (R)- <b>8c</b> | -84.4955      | -2.78647  | -5.59387 |
| (S)- <b>8d</b> | -102.496      | -12.1057  | -7.491   |
| (R)- <b>8d</b> | -79.0166      | -7.77168  | -3.27213 |
| (S)- <b>8e</b> | -97.1576      | -7.49549  | -4.62095 |
| (R)- <b>8e</b> | -85.5462      | -5.56573  | -1.57816 |
| (S)- <b>8f</b> | -110.456      | -9.48398  | -2.62015 |
| (R)- <b>8f</b> | -80.3773      | -1.33976  | -5.50014 |
| (S)- <b>9b</b> | -94.5623      | -5.33333  | -7.63276 |
| (R)- <b>9b</b> | -82.3833      | -8.45774  | -4.99611 |
| (S)- <b>9c</b> | -105.201      | -4.4125   | -6.8652  |
| (R)- <b>9c</b> | -92.4029      | 0.375594  | -4.915   |
| (S)- <b>9d</b> | -93.087       | -3.43971  | -3.94599 |
| (R)- <b>9d</b> | -102.403      | -5.70107  | -3.30324 |
| (S)- <b>9e</b> | -97.4871      | -4.61057  | 0        |
| (R)- <b>9e</b> | -90.7655      | -4.02959  | -8.75642 |
| (S)- <b>9f</b> | -92.252       | -4.16681  | -2.49799 |
| (R)- <b>9f</b> | -83.726       | -0.300184 | 0        |
| VPNa           | -64.703       | -5.43962  | -6.16675 |

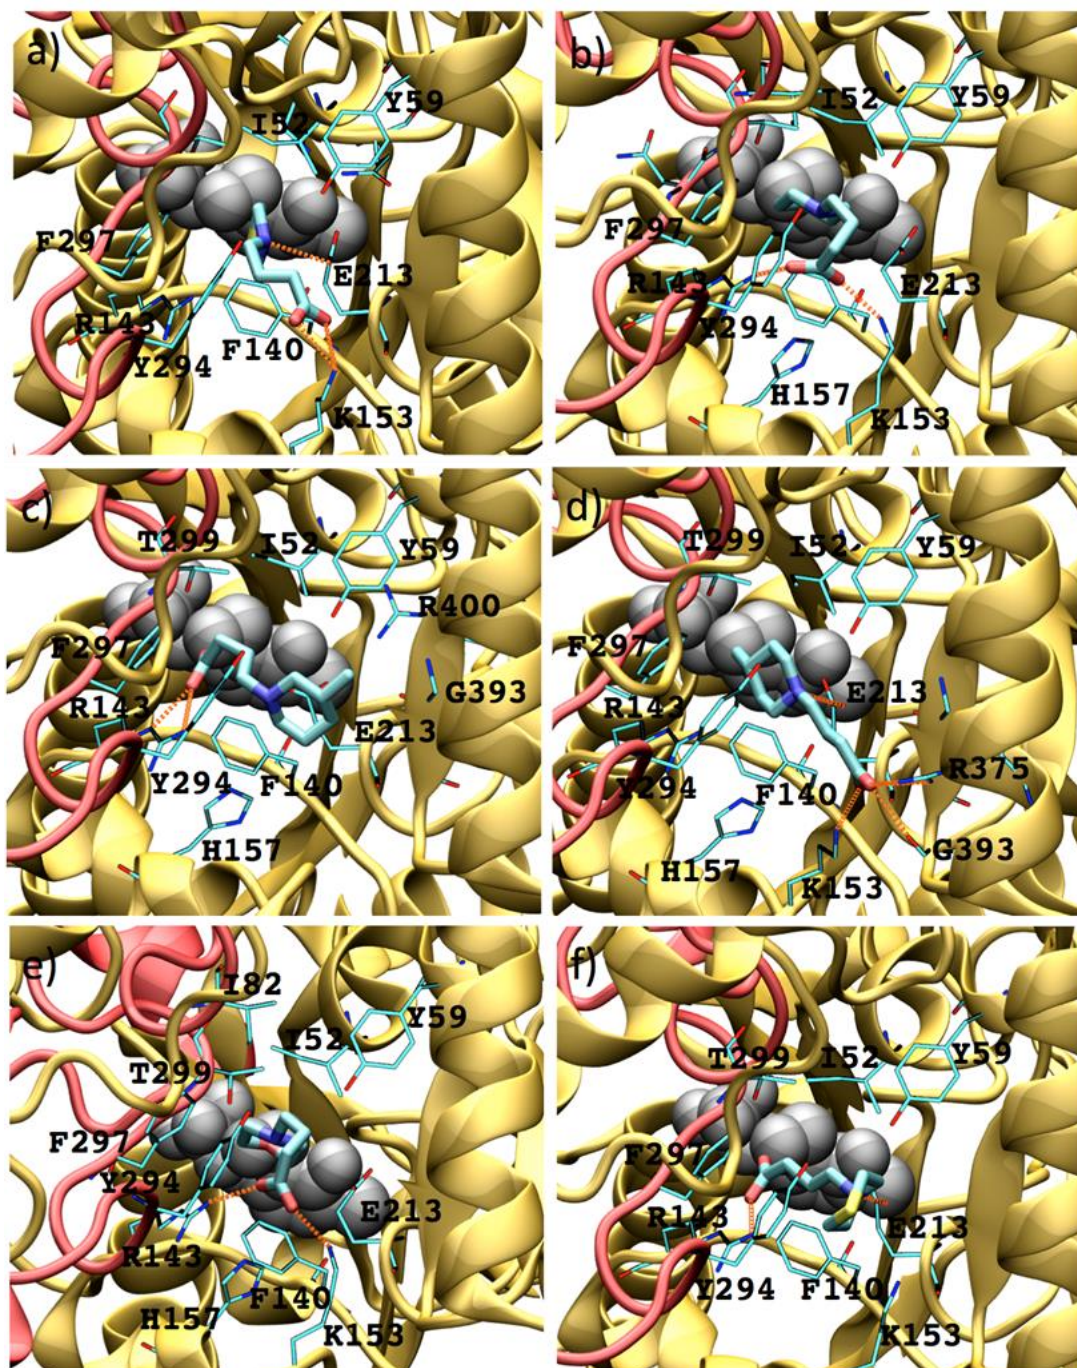

**Figure 49S.** Interactions between GABA analogues **7** and *Human* GABA-AT. a) **7a**, b) **7b**, c) **7c**, d) **7d**, e) **7e** and f) **7f**. PLP prosthetic group is shown as Van der Waals spheres and each protein chain is colored in yellow and red. Residues at 4 Å of each analogue are indicated. Hydrogen bonds are shown as orange dashed lines.

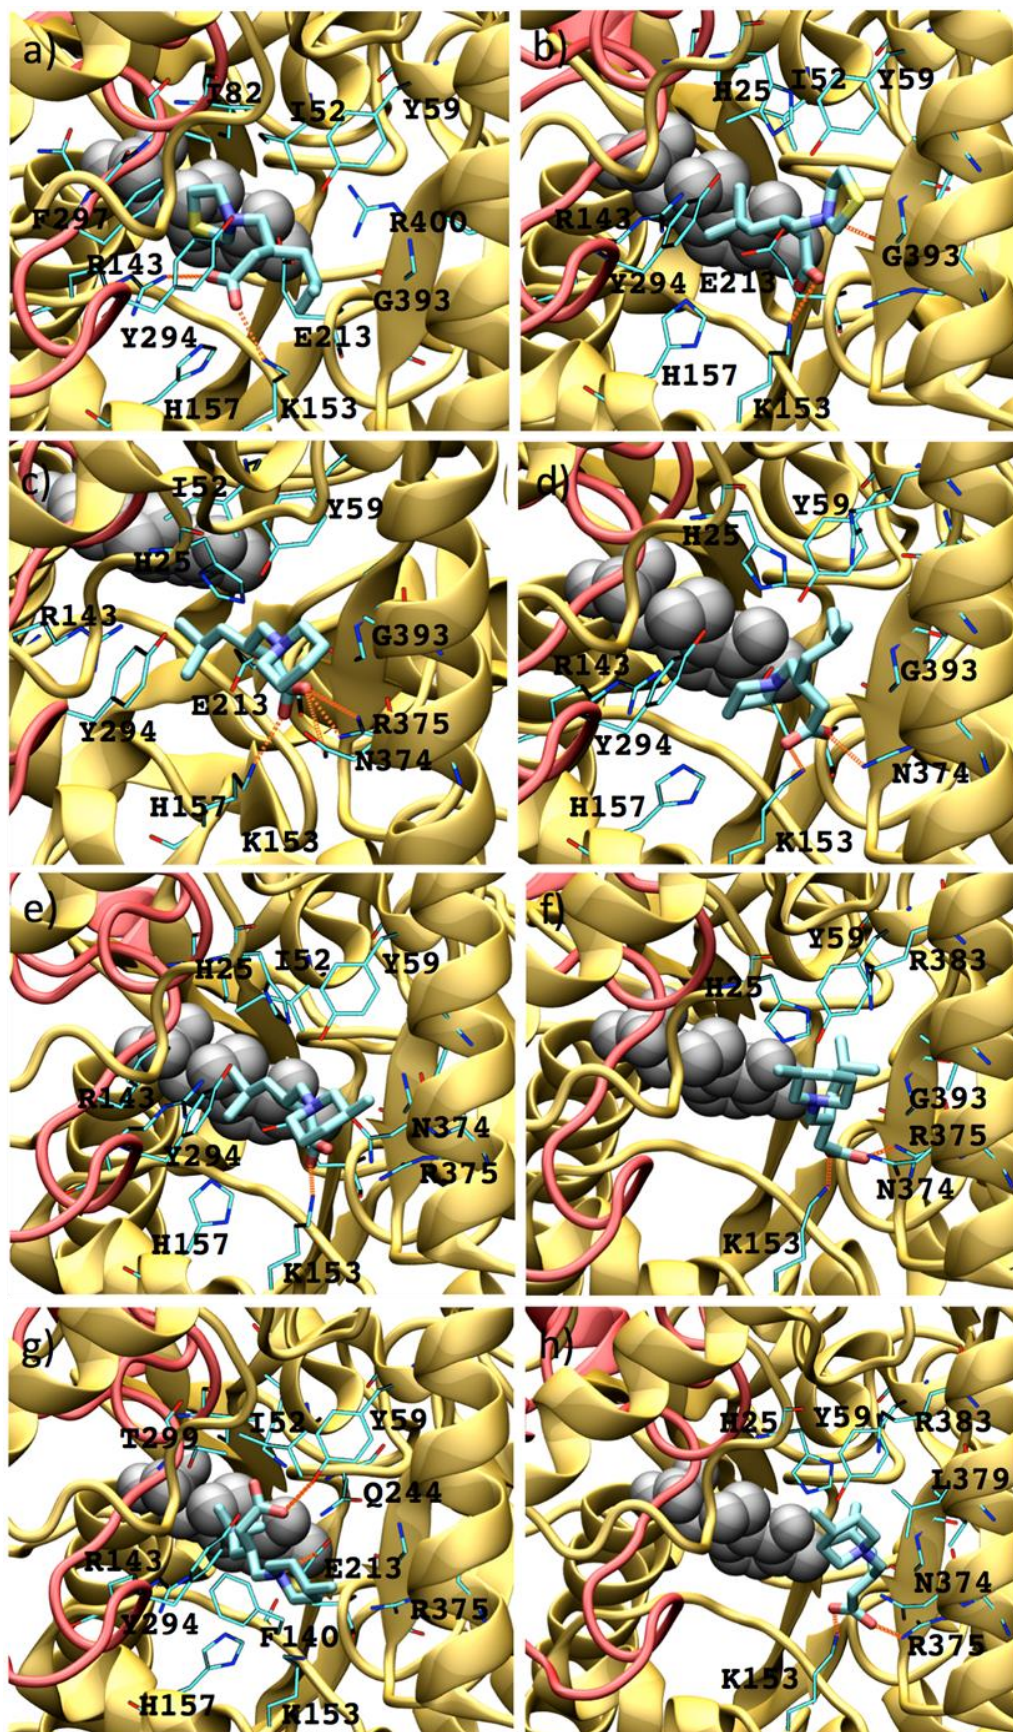

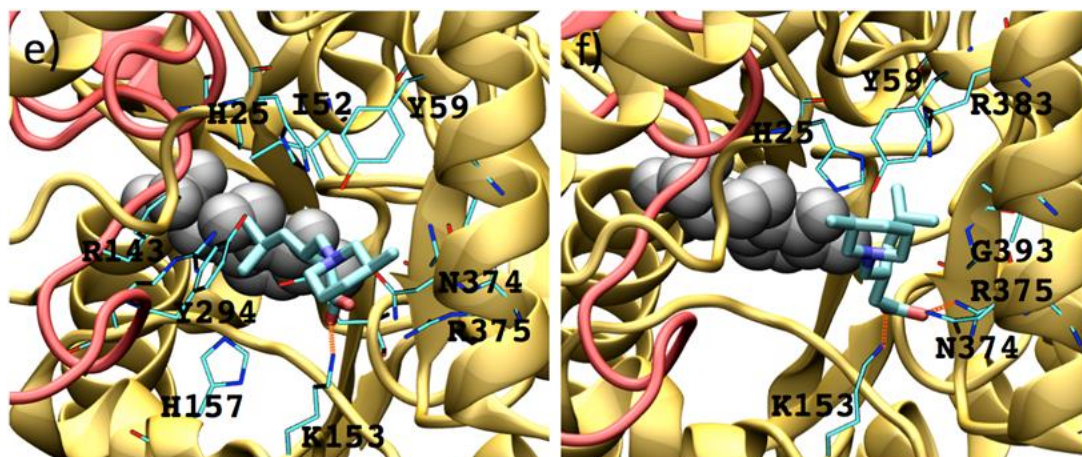

**Figure 50S.** Interactions between GABA analogues **8** and *Human* GABA-AT. a) (*S*)-**8a**, b) (*R*)-**8a**, c) (*S*)-**8b**, d) (*R*)-**8b**, e) (*S*)-**8c** and f) (*R*)-**8c**, g) (*S*)-**8d**, h) (*R*)-**8d**, i) (*S*)-**8e**, j) (*R*)-**8e**, k) (*S*)-**8f**, l) (*R*)-**8f**. PLP prosthetic group is showed as Van der Waals spheres and each protein chain is colored in yellow and red. Residues at 4 Å of each analogue are indicated. Hydrogen bonds are shown as orange dashed lines.

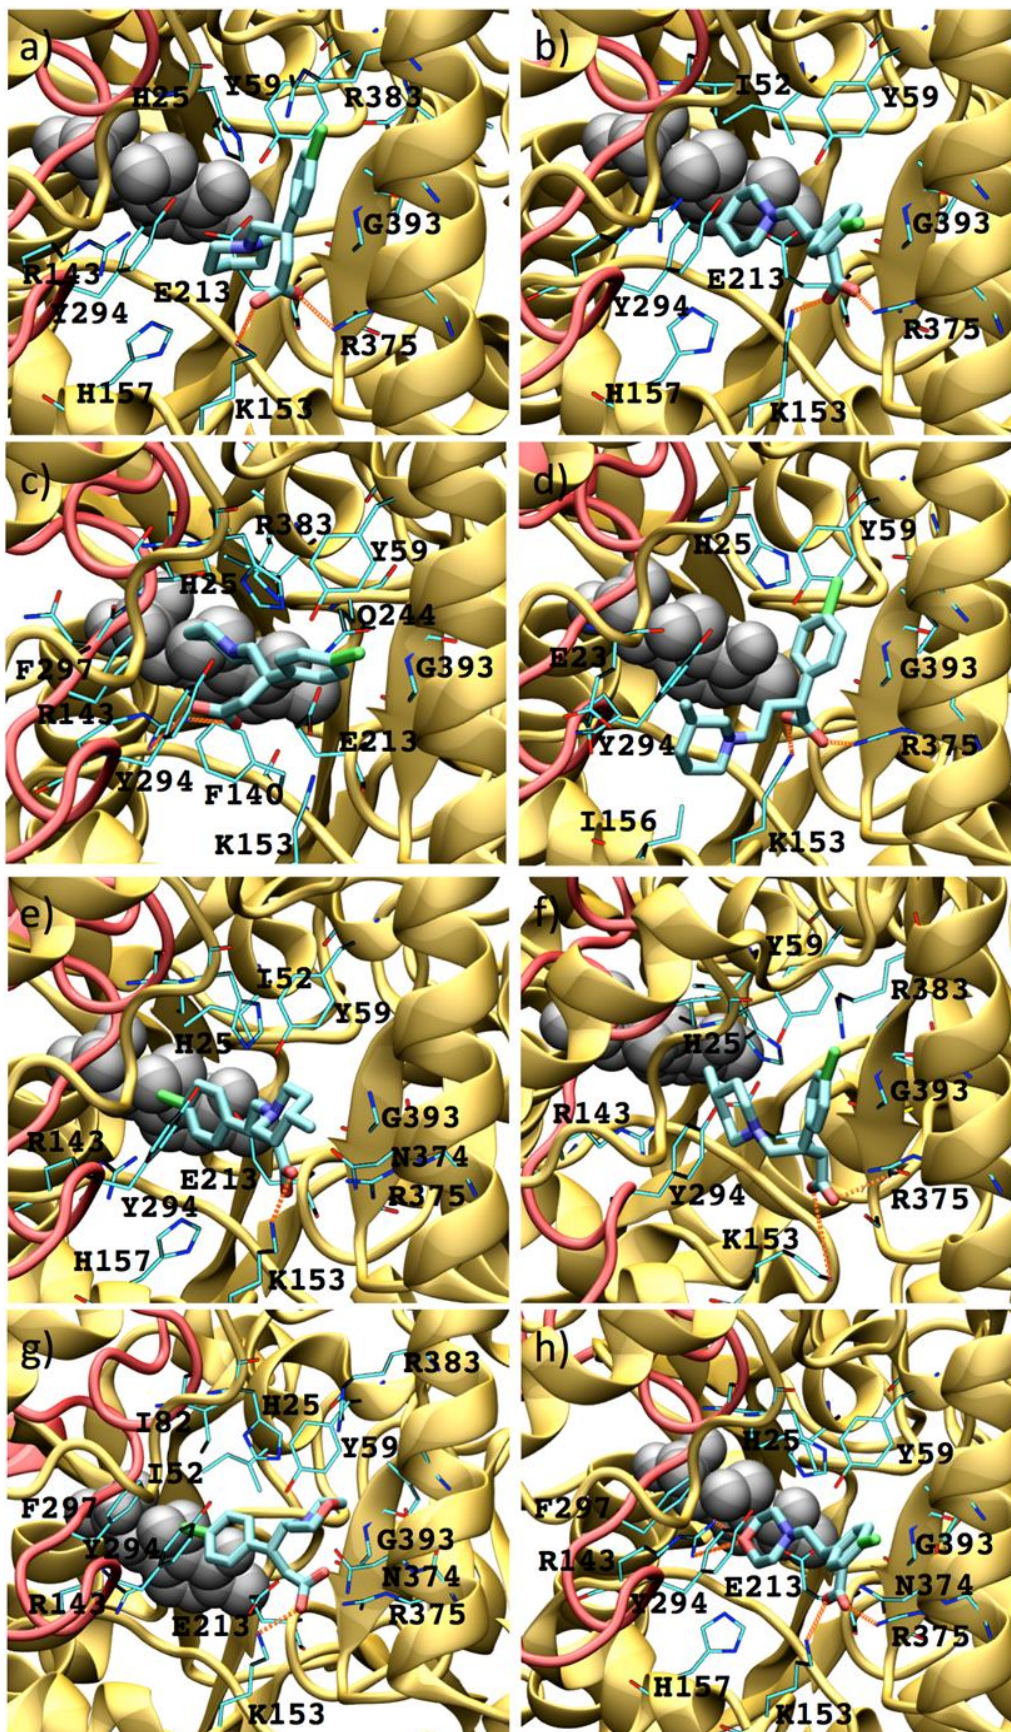

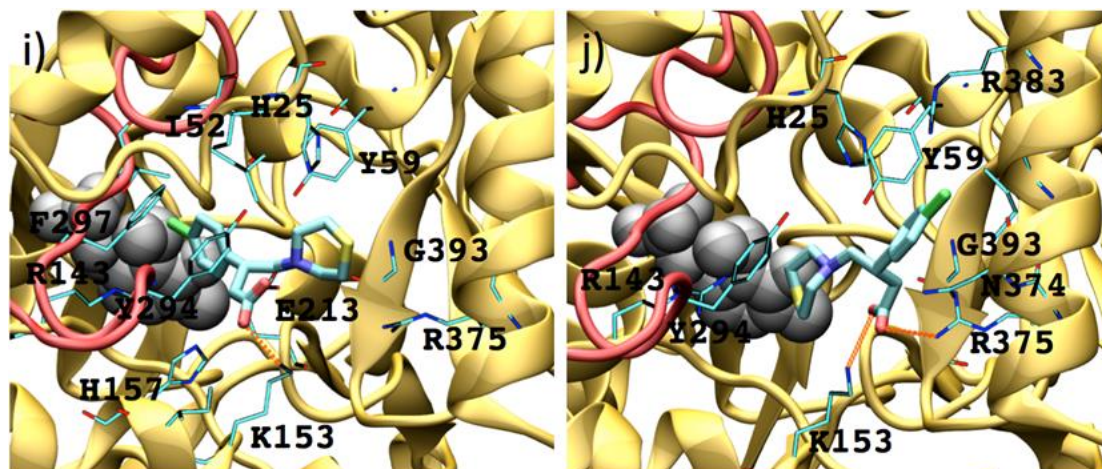

**Figure 51S.** Interactions between GABA analogues **9** and *Human* GABA-AT. a) (*S*)-**9b**, b) (*R*)-**9b**, c) (*S*)-**9c** and d) (*R*)-**9c**, e) (*S*)-**9d**, f) (*R*)-**9d**, g) (*S*)-**9e**, h) (*R*)-**9e**, i) (*S*)-**9f**, j) (*R*)-**9f**. PLP prosthetic group is showed as Van der Waals spheres and each protein chain is colored in yellow and red. Residues at 4 Å of each analogue are indicated. Hydrogen bonds are shown as orange dashed lines.

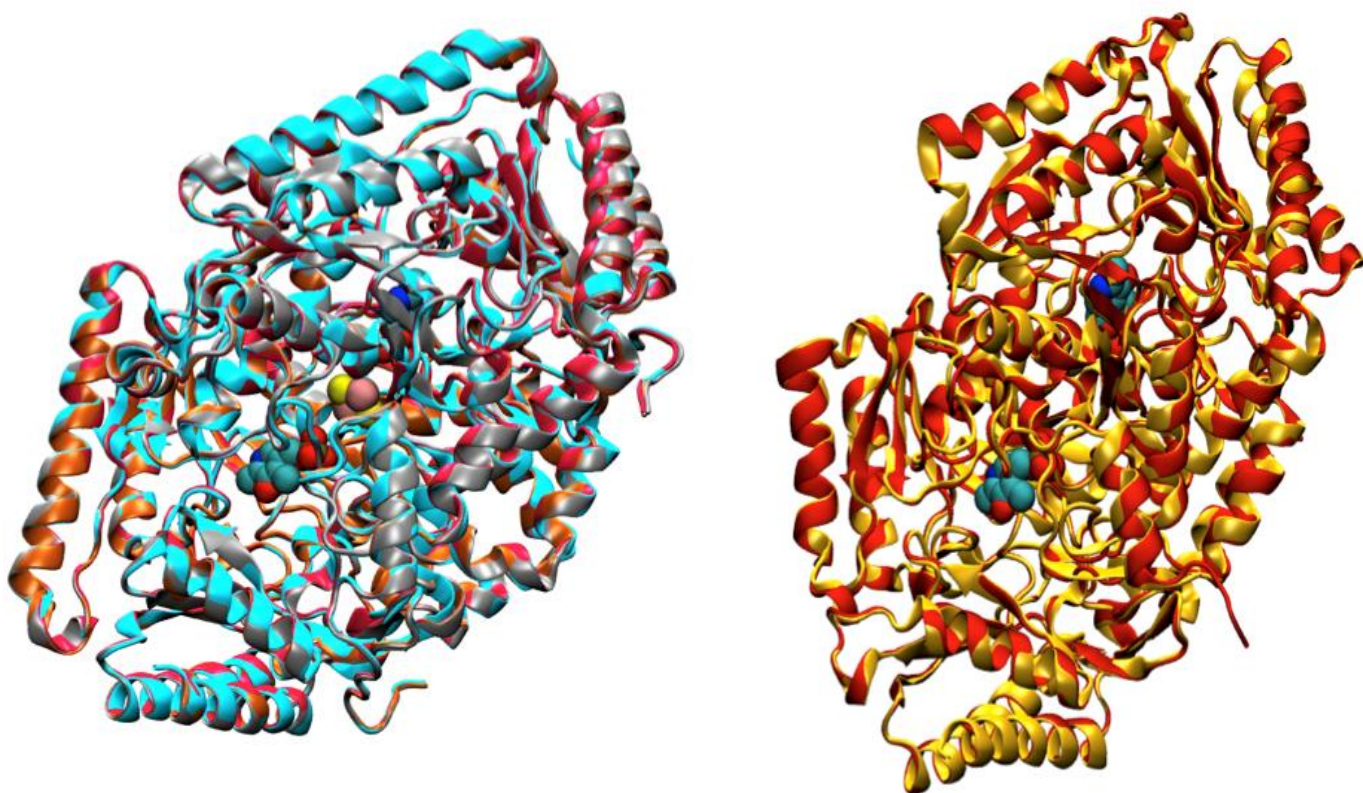

**Figure 52S.** Backbone structural alignment of GABA-AT structures. a) GABA-AT human model in cyan color. **1ohv**, **1ohw** and **1ohy** *Sus scrofa* crystal structures in red (RMSD=0.35), gray (RMSD=0.36) and orange (RMSD=0.40) color respectively. b) GABA-AT *Pseudomonas fluorescens* model in shiny red color, **1sf2** *E. coli* structure in shiny yellow color (RMSD= 0.52). Fe<sub>2</sub>S<sub>2</sub> (yellow/pink color) and PLP from human model in VDW representation.



**Table 2S.** Energy interactions values obtained from the docking calculations of all GABA derivatives and *human* GABA-AT model. All the values are in kcal/mol.

| <b>Ligand</b> | <b>MolDock Score</b> | <b>Electro</b> | <b>HBond</b> |
|---------------|----------------------|----------------|--------------|
| <b>7a</b>     | -73.7827             | -11.6791       | -6.37482     |
| <b>7b</b>     | -90.0906             | -14.3794       | -2.70548     |
| <b>7c</b>     | -87.1437             | -4.79249       | -4.66131     |
| <b>7d</b>     | -93.3451             | -16.3569       | -7.2265      |
| <b>7e</b>     | -101.729             | -10.9936       | -4.12353     |
| <b>7f</b>     | -83.6899             | -11.9784       | -3.44067     |
| <b>(S)-8a</b> | -112.119             | -7.99459       | -3.85277     |
| <b>(R)-8a</b> | -97.5094             | -6.93326       | -3.08695     |
| <b>(S)-8b</b> | -98.5854             | -11.0659       | -5.84991     |
| <b>(R)-8b</b> | -93.2925             | -12.0228       | -1.80199     |
| <b>(S)-8c</b> | -113.181             | -7.06026       | -2.5         |
| <b>(R)-8c</b> | -89.7572             | -13.2412       | -3.34681     |
| <b>(S)-8d</b> | -107.919             | -2.81265       | -4.36016     |
| <b>(R)-8d</b> | -93.1624             | -5.66396       | -2.5         |
| <b>(S)-8e</b> | -111.347             | -2.23916       | -0.215018    |
| <b>(R)-8e</b> | -103.812             | -14.4581       | -3.64372     |
| <b>(S)-8f</b> | -105.834             | -13.386        | -2.83697     |
| <b>(R)-8f</b> | -89.8468             | -13.3805       | -2.49901     |
| <b>(S)-9b</b> | -100.144             | -8.84278       | -3.14615     |
| <b>(R)-9b</b> | -95.7124             | -11.0181       | -2.4786      |
| <b>(S)-9c</b> | -105.791             | -11.6063       | -2.11356     |
| <b>(R)-9c</b> | -91.5724             | -8.52886       | -3.78333     |
| <b>(S)-9d</b> | -107.209             | -10.6489       | -2.5         |
| <b>(R)-9d</b> | -98.4869             | -10.3527       | -3.17113     |
| <b>(S)-9e</b> | -109.605             | -9.38255       | -2.5         |
| <b>(R)-9e</b> | -112.69              | -10.5368       | -8.05182     |
| <b>(S)-9f</b> | -122.362             | -10.3354       | -2.5         |
| <b>(R)-9f</b> | -103.599             | -9.33766       | -2.4934      |
| <b>VPNa</b>   | -73.7153             | -7.61745       | 0            |

**Table 3S.** Values of the experimental ( $Y_{Exp}$ ), calculated ( $Y_{Cal}$ ) and predicted ( $Y_{Pred}$ ) percent of inhibition of the GABA derivatives. Compounds that were considered form the test validation are marked with a script symbol.

| Mol          | Y <sub>Calc1</sub> | Y <sub>Pred1</sub> | Y <sub>Calc2</sub> | Y <sub>Pred2</sub> | Y <sub>Calc3</sub> | Y <sub>Pred3</sub> | Y <sub>Calc4</sub> | Y <sub>Pred4</sub> | Y <sub>Calc5</sub> | Y <sub>Pred5</sub> | Y <sub>Calc6</sub> | Y <sub>Pred6</sub> | Y <sub>Calc7</sub> | Y <sub>Pred7</sub> | Y <sub>Calc8</sub> | Y <sub>Pred8</sub> | Y <sub>Calc9</sub> | Y <sub>Pred9</sub> | Y <sub>Calc10</sub> | Y <sub>Pred10</sub> | Y <sub>Exp</sub> |
|--------------|--------------------|--------------------|--------------------|--------------------|--------------------|--------------------|--------------------|--------------------|--------------------|--------------------|--------------------|--------------------|--------------------|--------------------|--------------------|--------------------|--------------------|--------------------|---------------------|---------------------|------------------|
| <b>7a</b>    | 25.68              | 26                 | -                  | 26.91              | 25.79              | 26.19              | -                  | 26.18              | 24.28              | 23.97              | 23.71              | 23.19              | 25.33              | 25.52              | -                  | 25.84              | -                  | 27.67              | -                   | 25.35               | <b>24.9</b>      |
| <b>7b</b>    | 19.65              | 18.12              | 20.76              | 19.59              | 20.43              | 19.15              | 20.19              | 19.06              | 19.9               | 18.33              | 21.19              | 20.34              | 20.47              | 19.07              | 20.67              | 19.4               | 21.29              | 19.88              | 20.11               | 18.62               | <b>24.9</b>      |
| <b>7c</b>    | 20.39              | 20.7               | 21.49              | 22.13              | -                  | 21.14              | 20.78              | 21.14              | 20.59              | 21.01              | 21.92              | 22.54              | 21.14              | 21.73              | 21.39              | 22.03              | -                  | 22.05              | 20.8                | 21.27               | <b>19.4</b>      |
| <b>7d</b>    | -                  | 21.45              | 22.55              | 22.42              | 22.17              | 21.92              | 21.65              | 21.28              | -                  | 21.59              | 22.99              | 23.01              | -                  | 22.12              | 22.42              | 22.25              | 23.16              | 23.29              | -                   | 21.8                | <b>22.9</b>      |
| <b>7e</b>    | 19.65              | 20.05              | 20.76              | 21.45              | 20.43              | 21.04              | 20.19              | 20.64              | 19.9               | 20.41              | 21.19              | 21.85              | 20.47              | 21.15              | -                  | 20.67              | 21.29              | 22.46              | 20.11               | 20.67               | <b>18.3</b>      |
| <b>7f</b>    | 28.54              | 29.91              | -                  | 29.8               | 28.51              | 29.96              | 28.67              | 30.88              | 26.79              | 27.01              | 26.08              | 25.8               | 27.87              | 28.87              | 28.54              | 30.86              | -                  | 30.67              | 27.99               | 29.65               | <b>26.5</b>      |
| <b>8a</b>    | 0.81               | 4.52               | 2.05               | 5.81               | 1.59               | 5.43               | -                  | 5.91               | -                  | 0.95               | -1.26              | 1.59               | 2.39               | 6.86               | 1.52               | 5.24               | 1.82               | 5.33               | 1.9                 | 5.54                | <b>-3.5</b>      |
| <b>8b</b>    | 0.16               | -0.12              | 1.27               | 1.47               | 1.46               | 1.66               | 4.29               | 5.94               | 1.62               | 2                  | 1.62               | 1.91               | 2.49               | 3.11               | 1.61               | 1.85               | 1.03               | 1.1                | 1.73                | 2.06                | <b>0.84</b>      |
| <b>8c</b>    | 5.87               | 5.85               | -                  | 6.97               | 7.01               | 7.22               | 8.95               | 9.64               | 6.97               | 7.19               | 7.35               | 7.63               | 7.75               | 8.17               | 7.19               | 7.41               | 6.96               | 7.14               | -                   | 7.11                | <b>5.96</b>      |
| <b>8d</b>    | 6.93               | 7.88               | 8.03               | 9.08               | 8.04               | 9.03               | -                  | 9.81               | 7.96               | 9                  | -                  | 8.41               | -                  | 8.73               | 8.22               | 9.18               | 8.06               | 8.97               | 8.11                | 9.2                 | <b>2.64</b>      |
| <b>8e</b>    | -                  | 0.16               | 1.27               | -0.99              | 1.46               | -0.06              | 4.29               | 3.39               | 1.62               | -0.64              | 1.62               | -0.09              | 2.49               | 1.08               | 1.61               | 0.17               | 1.03               | -0.9               | 1.73                | 0.06                | <b>6.2</b>       |
| <b>8f</b>    | 9.05               | 5.27               | 10.31              | 5.81               | 9.54               | 5.85               | 12.78              | 9.08               | -                  | 8.5                | -                  | 6.51               | 9.89               | 6.39               | 9.48               | 5.49               | 10.4               | 5.94               | 9.61                | 6.31                | <b>16.8</b>      |
| <b>9b*</b>   | -                  | -                  | -                  | -                  | -                  | -                  | -                  | -                  | -                  | -                  | -                  | -                  | -                  | -                  | -                  | -                  | -                  | -                  | -                   | -                   | <b>73</b>        |
| <b>9c</b>    | -                  | 26.19              | 27.89              | 25.5               | 27.99              | 12.55              | 27.69              | 20.73              | 28.12              | 31.25              | 28.07              | 52.09              | 28.17              | 35.81              | -                  | 28.34              | 27.9               | 25.78              | 27.98               | 27.46               | <b>28</b>        |
| <b>9d</b>    | 9.21               | 18.37              | 8.87               | 9.17               | -                  | 7.64               | 8.12               | 7.55               | 9.23               | 10.15              | -                  | 11.64              | 9.26               | 10.4               | 9.08               | 16.37              | 8.96               | 9.38               | 8.94                | 9.34                | <b>8.6</b>       |
| <b>9e</b>    | 5.14               | 3.56               | 5.21               | 4.03               | -                  | 4.45               | 5.95               | 5.37               | 6                  | 5.48               | 7.43               | 8.27               | 6.16               | 5.54               | 5.63               | 4.41               | 4.99               | 3.68               | 5.71                | 5                   | <b>7</b>         |
| <b>9f</b>    | 15.45              | 18.65              | 15.83              | 17.97              | 14.21              | 29.61              | 16.04              | 17.9               | 14.45              | 14.81              | 13.7               | 13.01              | -                  | 15.13              | 15.09              | 17.44              | 15.94              | 18.12              | 15.17               | 16.05               | <b>14.2</b>      |
| <b>VPNa*</b> | -                  | -                  | -                  | -                  | -                  | -                  | -                  | -                  | -                  | -                  | -                  | -                  | -                  | -                  | -                  | -                  | -                  | -                  | -                   | -                   | <b>40</b>        |

\* Molecules considered as outliers.

- Compounds considered for the test validation.
